1

# APRANK: computational prioritization of antigenic proteins and peptides from complete pathogen proteomes

Alejandro D. Ricci<sup>1</sup>, Mauricio Brunner<sup>1,§</sup>, Diego Ramoa<sup>1</sup>, Santiago J. Carmona<sup>1,†</sup>, Morten Nielsen<sup>1,2</sup> and Fernán Agüero<sup>1,\*</sup>

<sup>1</sup>*Instituto de Investigaciones Biotecnológicas “Rodolfo Ugalde” (IIB), Universidad de San Martín (UNSAM) – Consejo Nacional de Investigaciones Científicas y Técnicas (CONICET), San Martín, B1650HMP, Buenos Aires, Argentina*

<sup>2</sup>*Department of Health Technology, The Technical University of Denmark, Lyngby, Denmark*

<sup>§</sup> *Present address: Hospital Italiano de Buenos Aires, Ciudad Autónoma de Buenos Aires, Argentina.*

<sup>†</sup> *Present address: Department of Oncology, Université de Lausanne, Centre Hospitalier Universitaire Vaudois, Ludwig Institute for Cancer Research, Lausanne, Switzerland.*

Correspondence\*:  
Corresponding Author  
fernana@iib.unsam.edu.ar

## 2 ABSTRACT

3 Availability of highly parallelized immunoassays has renewed interest in the discovery of  
4 serology biomarkers for infectious diseases. Protein and peptide microarrays now provide a  
5 rapid, high-throughput platform for immunological testing and validation of potential antigens  
6 and B-cell epitopes. However, there is still a need for tools to prioritize and select relevant  
7 probes when designing these arrays. In this work we describe a computational method called  
8 APRANK (Antigenic Protein and Peptide Ranker) which integrates multiple molecular features  
9 to prioritize antigenic targets in a given pathogen proteome. These features include subcellular  
10 localization, presence of repetitive motifs, natively disordered regions, secondary structure,  
11 transmembrane spans and predicted interaction with the immune system. We applied this method  
12 to prioritize potentially antigenic proteins and peptides in a number of bacteria and protozoa  
13 causing human diseases: *Borrelia burgdorferi* (Lyme disease), *Brucella melitensis* (Brucellosis),  
14 *Coxiella burnetii* (Q fever), *Escherichia coli* (Gastroenteritis), *Francisella tularensis* (Tularemia),  
15 *Leishmania braziliensis* (Leishmaniasis), *Leptospira interrogans* (Leptospirosis), *Mycobacterium*  
16 *leprae* (Lepae), *Mycobacterium tuberculosis* (Tuberculosis), *Plasmodium falciparum* (Malaria),  
17 *Porphyromonas gingivalis* (Periodontal disease), *Staphylococcus aureus* (Bacteremia), *Streptococcus*  
18 *pyogenes* (Group A Streptococcal infections), *Toxoplasma gondii* (Toxoplasmosis) and *Trypanosoma*  
19 *cruzi* (Chagas Disease). We have tested this integrative method using non-parametric ROC-  
20 curves and made an unbiased validation using an independent data set. We found that APRANK  
21 is successful in predicting antigenicity for all pathogen species tested, facilitating the production

22 of antigen-enriched protein subsets. We make APRANK available to facilitate the identification of  
23 novel diagnostic antigens in infectious diseases.

24 **Keywords:** antigens, linear epitopes, antigenicity, prediction, human pathogens

## 1 INTRODUCTION

25 Infectious diseases are one of the first causes of death worldwide, disproportionately affecting poor  
26 and young people in developing countries. Several epidemiological and medical strategies exist to deal  
27 with these diseases, most of which rely on robust and accurate diagnostic tests. These tests are used to  
28 demonstrate infection (presence of the pathogen), to follow up treatments and to monitor the evolution or  
29 cure of the disease or the success of field interventions (Peeling and Nwaka, 2011).

30 One of the preferred methods to diagnose infections relies on the detection of pathogen-specific antibodies  
31 in the fluids of infected patients (most often serum obtained from blood) (Washington, 1996; Vainionpää  
32 and Leinikki, 2008). However, knowledge of B-cell antigens and epitopes is scarce for many species. For  
33 this reason, there is a big interest in developing reliable methods able to improve the fast and sensitive  
34 identification of potential specific antigens.

35 With the advent of peptide microarray platforms it is now possible to perform high-throughput serological  
36 screening of short peptides, which allows for faster discovery of linear antigenic determinants with good  
37 potential for diagnostic applications (Pellois et al., 2002). Taking advantage of complete genome sequences  
38 from pathogens, it is theoretically possible to scan every encoded protein with short peptides against  
39 sera from infected hosts. However, while this is straightforwardly achieved for viral pathogens and small  
40 bacteria, it gets more difficult when dealing with larger bacteria or eukaryotic parasites, since they can  
41 reach thousands of proteins with millions of peptides, exceeding the average capacity of standard protein  
42 or peptide microarrays (Sutandy et al., 2013). Besides, it is now becoming common to fit in the arrays  
43 additional sequence variants obtained from the pathogen population (from diverse strains and clinical  
44 isolates). One example are serological strain typing strategies (Balouz et al., 2021), which would stress the  
45 capacity of these platforms.

46 Recently, ultrahigh-density peptide microarrays had been used successfully to map linear epitopes, having  
47 an upper theoretical limit of  $\sim 2$ -3 million unique peptides per array (Buus et al., 2012). While these  
48 ultrahigh-density peptide microarrays do enable a lot of possibilities, they do not yet have the capacity to  
49 analyze whole proteomes of larger pathogens without some preprocessing. It is also worth noting that they  
50 are not widely available as lower density arrays and they require substantial processing and downstream  
51 work to deal with large proteomes (Carmona et al., 2015; Durante et al., 2017; Mucci et al., 2017).

52 There are several ways to deal with the problem of not having enough space when accommodating large  
53 proteomes in a peptide array, each with their own advantages and disadvantages. The most common are:  
54 decreasing the overlap between peptides, dividing the proteome among different microarray slides, and  
55 using computational methods to prioritize antigens. In this paper we will focus on the latter. We and others  
56 have previously shown that a number of protein features can be used to validate and prioritize candidate  
57 antigens and epitopes for human pathogens (Carmona et al., 2012, 2015; Liu et al., 2018; Liang and Felgner,  
58 2012). Similar approaches have also been developed into a number of reverse vaccinology programs for  
59 bacteria (reviewed recently in Dalsass et al. (2019)).

60 In a previous work, we developed a method that integrates information from a number of calculated  
61 molecular and structural features to compute an antigenicity score for proteins and peptides in

62 *Trypanosoma cruzi* (Carmona et al., 2012, 2015). In this paper, we use machine learning techniques  
63 to extend and generalize this concept so that it can be applied to other pathogens. We call this method  
64 APRANK (Antigenic Protein and Peptide Ranker) and show how it can be used as a strategy to predict and  
65 prioritize diagnostic antigens for several human pathogens.

## 2 MATERIALS AND METHODS

### 66 2.1 Bioinformatic analysis

67 FASTA files containing proteins of the species used to train APRANK (see Table 1) were downloaded  
68 from publicly available database resources (from complete proteomes). To comply with requirements  
69 of downstream predictors, unusual amino acid characters were replaced by the character 'X' and a few  
70 proteins with more than 9,999 amino acids were truncated to that size. To obtain information at peptide  
71 level, proteins were split into peptides of 15 residues with an overlap of 14 residues between them (meaning  
72 an offset of 1 residue between peptides).

73 Validated FASTA files were analyzed with BepiPred (Larsen et al., 2006), EMBOSS pepstats, Iupred  
74 (Dosztányi, 2018), NetMHCIIpan (Nielsen et al., 2010), NetOglyc (Julenius et al., 2005), NetSurfp  
75 (Klausen et al., 2019), Paircoil2 (McDonnell et al., 2006), PredGPI (Pierleoni et al., 2008), SignalP  
76 (Petersen et al., 2011), TMHMM (Krogh et al., 2001), Xstream (Newman and Cooper, 2007) and two  
77 custom perl scripts that analyzed similarity of short peptides against the human genome (NCBI BioProject  
78 PRJNA178030). The reasoning of choosing each predictor, what they predict and which version was used  
79 can be found in Table 2. The full console call for each predictor can be seen in Supplementary Table S2.  
80 NetMHCIIpan was run multiple times for different human alleles (DRB1\*0101, DRB3\*0101, DRB4\*0101  
81 and DRB5\*0101). The only predictor that needed an extra preprocessing step was PredGPI, which required  
82 removing sequences shorter than 41 amino acids and those with an 'X' in their sequence. For all purposes,  
83 these filtered sequences were assumed to not have a GPI anchor signal. The versions of Linux, R, Perl,  
84 packages and modules used to create the computational method are listed in Supplementary Table S1.

### 85 2.2 Compiling a dataset of curated antigens

86 To obtain antigenic proteins and peptides, we extracted information from the immune epitope database  
87 (IEDB), as well as information from several papers, most of which relied on data from protein or peptide  
88 microarrays combined with sera of infected patients to find new antigens (Carmona et al., 2012; Vita et al.,  
89 2019; Martini et al., 2020; Xu et al., 2008; Barbour et al., 2008; Richer et al., 2015; Lawrenz et al., 1999;  
90 Eyles et al., 2007; Lu et al., 2007; Kilmury and Twine, 2010; Beare et al., 2008; Wang et al., 2013; Xiong  
91 et al., 2012; Vigil et al., 2011; Chen et al., 2009; Liang et al., 2010; Lessa-Aquino et al., 2013).

92 Because different protein identifiers are used across papers, we used either the Uniprot ID mapping tool,  
93 the blastp suite of BLAST or a manual mapping to find the corresponding ID or IDs that a given antigen  
94 had in our proteomes. The exhaustive list of all antigenic proteins and peptides used, their source and their  
95 mapping methods can be found in the Supplementary Data accompanying this article.

96 For the antigenic peptides, though, mapping the original protein ID to our pathogen proteomes was  
97 not enough; we also had to assign the antigenicity to the corresponding peptide or location within each  
98 antigenic protein, which meant dealing with the fact that the curated antigenic sequences varied in size. To  
99 do this, we developed our own mapping method that we called 'kmer expansion'. This method marked as  
100 antigenic any peptide that shared a kmer of at least 8 amino acids with a curated antigenic sequence for the  
101 same protein. The amount of total and antigenic peptides, before and after the 'kmer expansion', are listed  
102 in Table 3.

103 In the case of *Onchocerca volvulus*, the method we used to derive antigenic proteins and peptides was  
104 based on experimental proteome-wide data on antibody-binding to short peptides (Lagatie et al., 2017).  
105 We followed the same rules used by these authors and assigned as antigenic all peptides they called  
106 ‘immunoreactive’. Because in this work we are using an offset of 1 between overlapped peptides (maximum  
107 overlap), we also considered as antigenic the neighboring peptides that shared at least a kmer of length 8  
108 with any immunoreactive peptide.

### 109 2.3 Clustering by sequence similarity

110 It is common practice in the literature to report antigenicity for a single or a few reference proteins or  
111 accession numbers. This information is then passed on to databases such as IEDB (Vita et al., 2019;  
112 Martini et al., 2020). Nevertheless, when dealing with complete proteomes, there are usually other paralogs  
113 with high sequence similarity to those labeled as antigenic. Since they have similar sequences, these  
114 proteins would then have similar properties which would likely result in similar outputs when running  
115 the predictors. However, because only one of those proteins is labeled as antigenic, this would hinder the  
116 learning capabilities of any models trained or tested with these data.

117 To improve the learning process of APRANK, and to account for unlabeled proteins, we calculated  
118 sequence similarity for all proteins in the 15 analyzed proteomes using blastp from the NCBI BLAST suite  
119 (Camacho et al., 2009) (console call in Supplementary Table S2). We then wanted to filter the BLAST  
120 output keeping only the good matches, which meant selecting a similarity threshold. After analyzing  
121 different matches, we arrived at a sensible compromise: trying to be as strict as possible without losing  
122 much data. For this we kept matches with a percentage of identical amino acids (*pident*) of at least 0.75, an  
123 expected value (*evalue*) less than or equal to  $1 \times 10^{-12}$  and a match length of at least half of the length of  
124 the shortest protein in the match.

125 Using these matches, we created a distance matrix where  $distance = 1 - pident$  and applied a single-  
126 linkage hierarchical clustering method. We then cut this tree using a cutoff of 0.25 ( $1 - pidentThreshold$ ),  
127 resulting in a set of clusters of similar proteins.

128 For the species-specific models, proteins in a given cluster were kept together in the training process,  
129 meaning they would all be either in the training set or in the test set.

130 For the generic models, any protein in the training set which belonged to a cluster with at least one other  
131 antigenic protein was also tagged as antigenic, even across species (obviously excluding the species being  
132 tested). As for the test set in the generic models, this would also occur, but only inside that same species.  
133 The amount of total and antigenic proteins, before and after using BLAST to find similar proteins inside  
134 each species, can be see in Table 3.

### 135 2.4 Data normalization

136 Each predictor used by APRANK varied on how they returned their values. Not only they had different  
137 value ranges, but while some of them returned their values per protein, others did so per peptide, kmer, or  
138 amino acid. For this reason, we needed to parse and normalize all outputs before feeding their data into our  
139 model.

140 Values returned by each predictor were normalized to fit a numeric range between 0 and 1. Different  
141 methods were used to normalize the data depending on each predictor, ranging from linear or sigmoid  
142 normalizations to a simple binary indicator of presence or absence of a given feature (such as signal peptide).  
143 The detailed steps for the normalization at protein and peptide level for each predictor are described in  
144 Supplementary Table S3 and the formulas used for these operations can be found in Supplementary  
145 Article S1. The methods used to normalize the output for each predictor were the result of analyzing the



146 distribution and spread of these outputs across all of our species for each predictor individually, coupled  
147 with biological knowledge of what each predictor was analyzing.

## 148 **2.5 Fitting the species-specific models**

149 Species-specific models were created to test the method and compare between balanced and unbalanced  
150 training sets. In this case a separate model was created for each species, using only train/test data from that  
151 organism alone. A schematic flowchart showing the logic of this procedure is shown in Figure 1. To fit  
152 each protein species-specific model, clusters for that species were divided in training and test sets in a 1:1  
153 ratio due to the low number of recorded antigens for some species. For this same reason, the training set  
154 was balanced with ROSE (Lunardon et al., 2014), generating an artificial training set with a similar number  
155 of antigenic and non-antigenic artificial proteins. This process, as well as all other described below, was  
156 repeated 50 times by re-sampling the clusters in the training and test sets.

157 A binomial logistic regression model was fitted for both the balanced and the unbalanced training sets  
158 using the generalized linear models in R (function `glm`). We chose this model for two reasons: because it  
159 allowed us to see a direct relationship between the models and our predictors via the coefficients of the  
160 model, and because it was not as affected as other more complex models by the existence of false negatives  
161 (which we knew existed because they were the novel antigens we wanted to find). Once the balanced  
162 and the unbalanced protein models were trained, we used them to predict the scores for the test set. The  
163 performance for each model, measured by the area under the ROC curve (AUC), was then calculated using  
164 the R package `pROC` (Robin et al., 2011). Additionally, two pseudo random set of scores were created  
165 by shuffling the scores achieved by both models. These random protein models were used to test if the  
166 performance of our models differed significantly from a random prediction.

167 For the peptide species-specific models, we divided the peptides into training and test sets by simply  
168 following the division of the proteins clusters, meaning that if a protein was in the training set for the protein  
169 model, its peptides would be in the training set for the peptide model for that iteration. The models were  
170 fitted and random scores calculated in a similar manner to the protein models. However, when we attempted  
171 to calculate the performance of the peptide models, our test set was too large to calculate performance  
172 based on AUC values in a reasonable time. We decided then to sample a subset of 50,000 peptides from  
173 the test set in a pseudo-random manner, making sure that the positive peptides were found in the subset  
174 and that the fraction of positive vs indeterminate/negative antigens was similar to the one in the test set  
175 (but never below 1% unless we ran out of antigens). All AUC values for the different peptide models were  
176 calculated using the same subset, and this process was repeated 5 times in each iteration, changing the  
177 subset each time.

178 Once all iterations were finished, we compared the AUCs obtained by the balanced and unbalanced  
179 models using a Student's t-test. Another set of t-tests were used to analyze the difference between each  
180 of those models and their relative random model. If the model had a significantly higher AUC than the  
181 corresponding random model, we considered the model achieved a successful prediction ( $p < 0.05$ ).

## 182 **2.6 Creating the generic models**

183 The generic (pan-species) models are the actual models used by APRANK. The objective of these models  
184 is to predict antigenic proteins and peptides for new species (which APRANK have never seen before). In  
185 a broad sense, they have to understand what makes a protein or a peptide antigenic. We achieved this by  
186 training the models with a large set of antigenic proteins and peptides from 15 different species, including  
187 gram-positive bacteria, gram-negative bacteria and eukaryotic protozoans.

188 To create the protein generic models, we used ROSE (Lunardon et al., 2014) to create a balanced training  
189 set of 3,000 proteins for each species and then merged all those balanced training sets together. With these  
190 data, a linear model was created following the same steps as for the species-specific models. Next, these  
191 models were used to predict the scores for the species being analyzed and the performance of the prediction  
192 was calculated the same way as for the species-specific protein models. A schematic visualization of this  
193 procedure is shown in Figure 2.

194 We created the peptide generic models in a similar manner, with balanced training sets from each of the  
195 species that contained 100,000 peptides each. In addition to the regular score calculated by using the model  
196 to predict the antigenicity of the test data, we also calculated a combined score, which was simply the  
197 mean of the protein and peptide scores for that peptide. The performance of the peptide generic models  
198 was calculated the same way as for the species-specific peptide models.

199 When testing these generic models, we created temporary leave-one-out generic models, where we used  
200 14 of the species to generate the model, and then tested the model in the 15th species. We then generated  
201 the final protein and peptide generic models using all 15 species and tested them by predicting antigenicity  
202 in *Onchocerca volvulus*, a novel species with experimental proteome-wide data (Lagatie et al., 2017).

## 203 2.7 Comparative performance

204 To discard the possibility that our model was simply detecting sequence similarity, we created a ‘BLAST  
205 model’, where we assigned to each protein a score based solely on how similar they were to a known  
206 antigenic protein from another organism. The score used was  $-\log_{10}(\text{evaluate})$  and then performance was  
207 calculated for each species.

208 We also wanted to make sure our model was combining information from several predictors. To rule out  
209 that performance was mainly driven by one predictor, we compared our prediction capabilities against  
210 the individual predictor with best AUC, which was BepiPred 1.0. To do this, the BepiPred score for each  
211 protein and peptide was obtained from the individual amino acid scores following the same steps we used in  
212 APRANK as detailed in Supplementary Table S3, but without normalizing it. The AUCs for the BepiPred  
213 peptide scores were calculated the same way as for the peptide species-specific models.

## 214 2.8 Availability

215 The code for running or modifying APRANK is available at GitHub (Ricci and Agüero, 2021), released  
216 under a BSD 2-Clause ‘Simplified License’, which is a permissive free software license. The repository  
217 also holds documentation on how to configure, and install dependencies (users are responsible for obtaining  
218 the corresponding licenses or permissions for some required predictors); as well as the trained generic  
219 models for proteins and peptides (in R files of type *.rda* containing compressed data structures).

## 3 RESULTS

220 Our aim in this work was to develop a computational method and associated pipeline capable of prioritizing  
221 candidate antigenic proteins and antigenic determinants (epitopes) from complete pathogen proteomes for  
222 downstream experimental evaluation. We have previously shown for *Trypanosoma cruzi* (Chagas Disease)  
223 that different criteria can be integrated and exploited in a computational strategy to further guide the  
224 process of diagnostic peptide discovery (Carmona et al., 2012). Here we extend this work to other human  
225 pathogens and improve the way in which features are weighted, hence providing a tool for the prioritization  
226 of candidate linear B-cell epitopes for a wide range of pathogens.

## 227 **Species and Features**

228 We selected human pathogens from a phylogenetically diverse set of taxa with experimentally validated  
229 antigen and/or epitope data to train and test our method. This included gram negative bacteria, gram  
230 positive bacteria and eukaryotic protozoans. The species and the diseases they cause are shown in Table 1.

231 We obtained the proteomes of these species (see Methods) and split each protein into peptides of 15  
232 residues. Once this was done, we used information from the immune epitope database (IEDB) along  
233 with manually extracted information from several papers to tag each protein and peptide as antigenic or  
234 non-antigenic. The ‘non-antigenic’ tag in this paper should be understood in the sense of proteins with no  
235 prior information on their antigenicity. The amount of total and antigenic proteins and peptides can be see  
236 in Table 3.

237 To develop a tool that can help identify candidate antigenic proteins and peptides, we used several  
238 predictors that focused on different properties of the proteins (Table 2). On a broad sense, these predictors  
239 assess: the antigenicity and/or immunogenicity of proteins (Larsen et al., 2006; Nielsen et al., 2010); the  
240 structural and post-translational features that can be predicted from the protein sequence, some of which  
241 may suggest the protein enters the secretory route or is anchored at the membrane (Julenius et al., 2005;  
242 Pierleoni et al., 2008; Petersen et al., 2011); the presence of internal tandem repeats in proteins, which have  
243 been described to modulate immunogenicity of proteins (Newman and Cooper, 2007) together with other  
244 structural features such as the presence of intrinsically unstructured or exposed regions in proteins which  
245 may effect their presentation in the context of an immune response (Dosztányi et al., 2005; McDonnell  
246 et al., 2006; Petersen et al., 2009; Krogh et al., 2001).

247 We have also implemented in APRANK a number of custom Perl and R scripts that measure sequence  
248 similarity between each pathogen protein and the human host (CrossReactivity), or itself (SelfSimilarity).  
249 The idea behind these measurements was to obtain additional information on highly conserved sequences  
250 that may result in e.g. potential lack of immune response (tolerance) if the pathogen sequence is highly  
251 similar to a human protein; or cross-reactivity of antigens and epitopes in other proteins from the same  
252 pathogen (self-similarity). These predictors provide information on desirable and undesirable properties  
253 that then need to be weighted accordingly to achieve good performance at the task of antigen and epitope  
254 prediction.

## 255 **Testing APRANK and ROSE on species-specific models**

256 Species-specific models were created to test the method and to compare between unbalanced training sets  
257 and training sets balanced using ROSE (see Methods). As the name implies, these models worked with  
258 only one species at a time, using a fraction of its proteins to predict antigenicity for the rest. After running  
259 the predictors for all proteins in the selected genome, we parsed and processed the different outputs and  
260 applied a normalization process to have them in a common scale.

261 We needed to divide our data into training and test sets. Often, training sets represent  $\sim 80\%$  of the data;  
262 however, in our case some species had a low number of validated antigens (see Table 3), which meant that  
263 choosing a 80/20 training/test set split would result in test sets having only a few antigenic proteins. This  
264 kind of imbalance tends to compromise the training process, making the model to focus on the prevalent  
265 class (non-antigenic) and ignore the rare class (antigenic) (Menardi and Torelli, 2014). For this reason,  
266 when training a model using data from a single species, we chose to split the training and test set 50/50,  
267 re-sampling proteins and peptides multiple times (see Methods). To improve the training process, we also  
268 used ROSE to balance our training sets, which works by generating artificial balanced samples from the  
269 existing classes, according to a smoothed bootstrap approach (Lunardon et al., 2014). Furthermore, we used

270 the similarity-based clustering of sequences to avoid placing highly similar sequences into both training  
271 and test sets.

272 We used these balanced training sets to fit a binomial logistic regression model, resulting in one model  
273 for proteins and one for peptides. These models, which we denominated *species-specific models*, were then  
274 used to predict the antigenicity of their respective test sets. The performance of APRANK was assessed by  
275 measuring the area under the ROC curve (AUC), using known antigens and epitopes in the protein and  
276 peptide test sets. This whole process was repeated 50 times, re-sampling which proteins were in the training  
277 set and which in the test set. A final APRANK AUC score for each species was calculated as the mean of  
278 all AUC scores for these iterations (see Figure 3). To assess the effect of balancing the data on our models  
279 using ROSE, we also assessed the performance of APRANK repeating the procedure described above using  
280 the unbalanced training sets instead, resulting in a set of AUC scores corresponding to species-specific  
281 models trained with unbalanced data.

282 These calculations were done for each of the 15 species, although for 3 of them there was no antigenicity  
283 information at the peptide level, and only protein models were calculated. The results are presented in  
284 Table 4. Our testing showed that APRANK was able to predict antigenicity for proteins and peptides in  
285 most cases, with good performance. The only species that did not have a successful prediction were *E. coli*  
286 for the protein model, and *M. tuberculosis* and *S. aureus* for the peptide model. In these cases, the final  
287 AUC corresponding to the species-specific model was not significantly different than a random prediction.  
288 As for the balancing of the data using ROSE, it seemed to have mostly positive or neutral effects in the  
289 predicting capabilities of our models, which meant we could safely use it in training our pan-species  
290 models.

### 291 **Development of APRANK as a pan-species ranker of antigens and epitopes**

292 In the previous section we used protein and peptide data from a given pathogen species to train a model  
293 that successfully predicted antigenicity for that same organism; however, our end goal was to have a model  
294 that was able to predict antigenicity for any pathogen. To achieve this, we created models trained with all  
295 species, which we called *protein generic models* and *peptide generic models*.

296 For these models, we used ROSE (Lunardon et al., 2014) to generate similar sized partitions of balanced  
297 data for each of the species, and then we merged this data and fitted a binomial logistic regression model,  
298 using the same as described before. When using the models to predict the peptide antigenicity scores, we  
299 also analyzed the predicting capabilities of what we called the *combined score*, which was a combination  
300 of the protein and peptide scores for a given peptide.

301 To validate these models we performed a leave-one-out cross-validation method (LOOCV), hence creating  
302 15 different protein generic models, each time leaving out one species (which was the one being used as  
303 test set). For the peptide generic models we followed a similar route, but we ended up with 12 models due  
304 to the lack of antigenicity information at peptide level for 3 of the 15 species.

305 The performance results for these models are presented in Table 5. The generic protein models were  
306 successful in predicting antigenicity for all species, and similar results were obtained also at the peptide  
307 level, achieving successful predictions even for *E. coli*, *M. tuberculosis* and *S. aureus*, which were the  
308 three species where the species-specific models performed poorly before. This observation suggests that  
309 performance is related to the amount and diversity of recorded antigens. As for the performance of these  
310 generic models, the observed AUC scores obtained similar values to the ones obtained in the species-specific  
311 models trained with balanced data, indicating that while these generic models did not have information



312 about the species being tested, the data obtained from all the other 14 species was enough to learn the  
313 generic rules that made a protein antigenic.

314 This is also evident when comparing the coefficients obtained in the different protein models. In the case  
315 of individual (species-specific) models, coefficients were less robust across iterations when there were few  
316 positive cases, and more robust with larger validated training examples, as expected (see Supplementary  
317 Figures S1 and S2). For the pan-species models, we found the coefficients to be very robust across all 15  
318 models, indicating that the different leave-one-out generic models reached a similar conclusion on what  
319 makes a protein ‘antigenic’ (see Supplementary Figure S3). This reinforces the idea that better performance  
320 is the result of more extensive training with diverse positive and negative examples.

### 321 **Using APRANK to obtain antigen-enriched sets**

322 Our generic models allowed us to rank proteins and peptides in a given species based on a model trained  
323 from other pathogens. Now, we wanted to use these scores to select a subset of proteins or peptides with an  
324 increased chance of being antigenic when compared to the whole proteome.

325 For this, we focused on *T. cruzi*, as this was the species with the largest number of recorded antigens  
326 within our collection. To obtain fair antigenicity scores for this protein we used the corresponding leave-  
327 one-out models created when testing the generic models. We analyzed the distribution of the normalized  
328 scores returned by these models, distinguishing between antigenic and non-antigenic proteins and peptides  
329 (see Figure 4). As was expected, the peak of the scores for the antigens is found to the right of the one for  
330 the non-antigens, indicating that the average score is higher for the antigenic proteins and peptides. Also,  
331 the amount of overlapping can be related to the corresponding AUC, where the higher the AUC, the less  
332 the overlapping.

333 Once we had our score distributions, we used them to select an antigen-enriched subset of proteins and  
334 peptides. This could be done in one of two ways: either by setting a score threshold or by simply selecting  
335 a fixed number of proteins and peptides within the top scores. After analyzing the distribution of score  
336 values, we decided to use the first option and selected those proteins and peptides with a normalized score  
337 of at least 0.6. We next calculated what we called *enrichment score* (ES), which was the proportion of  
338 antigens in the selected subset relative to the proportion of antigens in the whole proteome (for example,  
339  $ES = 2$  meant you were twice as likely to find an antigen in the subset than in the whole proteome, or in a  
340 random subset). In Figure 4 we show the enrichment scores for the different normalized scores and the  
341 number of proteins and peptides that fall inside or outside those subsets. While the subsets were usually a  
342 small fraction of the whole proteome (close to 10% in most cases), this represents a 4 – 6 fold increase in  
343 the chances of finding antigens in those subsets.

344 As an example, suppose a microarray with a capacity of 200,000 unique peptides. Based on the current  
345 antigenic data we possess, a random sampling of the *T. cruzi* proteome would lead to the inclusion of  
346  $\sim 140$  antigenic peptides in that microarray. However, using APRANK to select the top 200,000 peptides  
347 with the highest normalized combined score, we would end up including almost 1,600 antigenic peptides in  
348 the array (an enrichment score of 11.35). This demonstrates the utility of tools like APRANK for selection  
349 of antigenic peptides for screening platforms.

### 350 **Assessing the validity of the computational method**

351 Now that we had a working pan-species model, we next analyzed the contribution of each predictor to the  
352 overall predicting capabilities of APRANK. This was done to confirm that the performance achieved by  
353 APRANK came from combining information from different predictors, and not from just one or a few of  
354 them. For this, we calculated the predicting capabilities of each individual predictor using their output as

355 score (data not shown). We found that the predictor with best solo predicting capabilities was BepiPred 1.0,  
356 so we compared its predictions against APRANK's for both the protein and peptide generic models for  
357 each species, which can be seen in Table 6.

358 We focused on those cases where the AUC changed at least 5% between BepiPred 1.0 and APRANK's  
359 generic models. APRANK showed increased predicting capabilities for 11 out of the 15 analyzed proteomes  
360 at the level of complete proteins and/or peptides, while showing a decrease in performance only in *M. leprae*  
361 at protein level. These results provide validation support to the approach built into APRANK by combining  
362 information from many predictors.

363 As an additional test, we also assessed the performance of APRANK after removing BepiPred 1.0  
364 predictions from our model. This can be seen in Supplementary Table S4. In this simulation we observed  
365 that even without BepiPred 1.0, our model reached similar predicting capabilities in most cases, hence  
366 suggesting that other predictors and features included in APRANK were able to replace BepiPred when  
367 training the model (this is further discussed in the Conclusions).

368 To ensure that our model was doing more than simply detecting sequence similarity, we also compared  
369 our performance against a 'BLAST model', meaning a model that was based solely on how similar a  
370 given protein was to a known antigenic protein. The comparison between the performance of this model  
371 and APRANK can be seen in Supplementary Table S5. As expected, APRANK achieved a larger AUC  
372 for most for the species; however we observed that for *M. leprae* and *L. braziliensis* the 'BLAST model'  
373 actually resulted in a better prediction. We believe this was due to them being species with a small amount  
374 of antigens and a high similarity to other of our selected species. To test this, we repeated this analysis for  
375 these two species, but now removing from the BLAST results (and so, from the 'model') the species that  
376 was the most similar to the one being analyzed. These new predictions indeed resulted in a considerable  
377 lower AUC, matching or falling behind APRANK.

### 378 **Applying our method on a novel species**

379 As a final step, we wanted to test APRANK on a new species that was not included in our initial training  
380 and that had an extensive amount of information on the antigenicity of its proteins and peptides. For this, we  
381 searched for publications containing proteome-wide linear epitope screenings using high-density peptide  
382 microarrays and selected a recent dataset produced by scanning the complete *Onchocerca volvulus* proteome  
383 with more than 800,000 short peptides (mostly 15mers) (Lagatie et al., 2017). *Onchocerca volvulus* is a  
384 nematode and it is the causative agent of Onchocerciasis in humans (also called river blindness), a disease  
385 that is on the list of Neglected Tropical Diseases (NTDs) of the World Health Organization (Holmes, 2014).

386 To obtain a list of antigens in *O. volvulus*, we followed the same rules applied by the authors to find the  
387 peptides they called 'immunoreactive' (see Methods in Lagatie et al.), resulting in a set of almost 1,100  
388 antigenic peptides. We tagged a protein as antigenic if it had at least one of these peptides; however, we  
389 also kept information on how many 'immunoreactive' peptides each protein had for later analysis. Once  
390 this was done, we also tagged as antigenic any neighboring peptide that shared at least 8 amino acids with  
391 one of these 'immunoreactive' peptides.

392 We next trained APRANK with all our 15 species and then used this model to predict the antigenicity  
393 scores for both the proteins and the peptides of *O. volvulus*. An AUC score was calculated for each  
394 prediction, comparing the score given by APRANK against the antigenic tag for each protein and peptide.  
395 We also calculated the enrichment scores for these scenarios using a score threshold of 0.6 in a similar way  
396 that we did for *T. cruzi*.

397 Our method was successful in predicting the antigenicity of proteins and peptides for *O. volvulus*, as  
398 shown in Table 7. We observed that if we were more strict when tagging a protein as antigenic, meaning  
399 requiring at least 2 or 3 ‘immunoreactive’ peptides before doing so, we obtained better performance. When  
400 considering as antigenic any protein with 1 ‘immunoreactive’ peptide we had an enrichment score of 2.28,  
401 whereas when we increased this requirement to 3 ‘immunoreactive’ peptides the enrichment score was 5.29  
402 (see Table 7, Figure 5). Besides validating the performance of APRANK on a new pathogen, this suggests  
403 that either our method is better in predicting proteins with many antigenic regions, or that a single reactive  
404 peptide from a peptide array screening may provide only weak support for calling of antigens.

405 For peptides, APRANK obtained an enrichment score of 3.29 – 3.80, also showing an additive effect  
406 when combined with the protein score, suggesting that these are effective in predicting antigenicity for  
407 *O. volvulus*. Similar to before, we tried being more strict and only considering antigenic peptides in  
408 proteins with at least 2 or 3 ‘immunoreactive’ peptides; however this did not seem to affect the predictive  
409 performance as much as for whole proteins.

## 4 DISCUSSION

410 We present APRANK, a novel method to prioritize and predict the best antigen candidates in a complete  
411 pathogen proteome. APRANK relies on a number of protein features that can be calculated for any protein  
412 sequence which are then integrated in a pan-species model. Our benchmarks show that by integrating  
413 multiple predictors, pooling antigen data from multiple species across a wide phylogenetic selection,  
414 and balancing training datasets, APRANK matches or outperforms a state-of-the-art predictor such as  
415 BepiPred 1.0 in most scenarios.

416 We have tested this integrative method using non-parametric ROC-curves and made an unbiased  
417 validation using an independent data set (*O. volvulus*) containing recent proteome-wide antigenicity  
418 data. In summary, we found APRANK to be successful in predicting antigenicity for all pathogen species  
419 tested, hence providing a new and improved method to obtain antigen-enriched protein and peptide subsets  
420 for a number of downstream applications.

### 421 4.1 Conclusions: looking forward

422 While we are satisfied by APRANK’s performance, there are still ways to further improve it. The main  
423 issue we had when training our models is the current lack or sparsity of validated epitope and antigen  
424 information. Particularly, well validated non-antigenic sets are currently hard to find in the literature,  
425 forcing us to count as non-antigenic all proteins and peptides that do not currently have experimental  
426 evidence of antigenicity or were not tagged as antigenic in databases (which we know is hardly true).

427 We also observed that the performance of APRANK was not considerably affected by removing some  
428 individual features. This might indicate that, as we observed previously (Carmona et al., 2012), each  
429 individual predictor contributes only slightly to the overall performance. Another alternative explanation is  
430 that there might be redundancy between some of the predictors. For example the features being used for  
431 training of BepiPred 1.0 HMMs (propensity scales for secondary structure preference and hydrophilicity  
432 of amino acid residues (Larsen et al., 2006)) may overlap others used internally by some of the predictors  
433 in APRANK. Future versions of APRANK will review these overlaps, analyzing the pros and cons of  
434 adding novel predictors or removing existing ones.

435 Regarding the computing performance of APRANK, the majority of the time is dedicated to run the  
436 predictors used internally, most of which run in a reasonable time in a commodity server. However,  
437 there are a few bottlenecks (most notably predictions by NetSurfP). This should be improved in a future

438 version in order to offer APRANK e.g. as a web-service. Future work will also explore the possibility to  
439 extend APRANK to also use data from other experimental (non-computable) sources, such as evidence of  
440 expression derived from proteomic or transcriptomic experiments.

## 441 **4.2 Equations**

442 See Supplementary Materials.

## **CONTRIBUTION TO THE FIELD**

443 The ability to predict which pathogen molecules elicit an immune response and are the target of antibodies  
444 during an infection is key for many diagnostic and clinical applications. Over time a number of predictors  
445 have been developed that seek to identify likely antigenic proteins and the portion of their structures that  
446 are recognized by antibodies (their epitopes). However this is a complex task which needs to be improved.  
447 Here we extend previous work and provide a new generalized method that succeeds in computing and  
448 extracting additional information from protein sequences, and use this information to train a model  
449 that can be used to prioritize candidate antigenic proteins from complete proteomes. Our integrative  
450 method –called APRANK– matches or outperforms existing predictors at the task of reducing the number  
451 of candidates down to a manageable and actionable number of likely antigenic proteins and epitopes. This  
452 is important for a number of downstream experimental assays. Using the described method and available  
453 software code, a complete pathogen proteome can be reduced to an enriched set of antigenic candidates for  
454 further evaluation.

## **CONFLICT OF INTEREST STATEMENT**

455 The authors declare that the research was conducted in the absence of any commercial or financial  
456 relationships that could be construed as a potential conflict of interest.

## **AUTHOR CONTRIBUTIONS**

457 Conceptualization: ADR SJC FA; Data curation: ADR MB DR; Formal analysis: ADR MN FA; Funding  
458 acquisition: FA; Investigation: ADR; Methodology: ADR MB DR MN; Project administration: FA;  
459 Resources: FA; Software: ADR MB DR; Supervision: SJC FA; Validation: ADR; Visualization: ADR;  
460 Writing – original draft: ADR FA; Writing – review & editing: ADR MN FA.

## **FUNDING**

461 Research reported in this publication was supported by the National Institute of Allergy and Infectious  
462 Diseases of the National Institutes of Health under award number R01AI123070 and by Agencia Nacional  
463 de Promoción Científica (Argentina) under award numbers PICT-2013-1193 and PICT-2017-0175. The  
464 content is solely the responsibility of the authors and does not necessarily represent the official views of  
465 the National Institutes of Health.

## **ACKNOWLEDGMENTS**

466 We would like to thank Carlos Buscaglia (IIB-UNSAM-CONICET) for helpful discussions and critical  
467 review of the manuscript.

## **SUPPLEMENTARY DATA**

468 Supplementary Material should be uploaded separately on submission, if there are Supplementary Figures,  
469 please include the caption in the same file as the figure. LaTeX Supplementary Material templates can be  
470 found in the Frontiers LaTeX folder.



## DATA AVAILABILITY STATEMENT

471 The datasets analyzed for this study and the software used are available in this GitHub Repository:  
472 <https://github.com/trypanosomatics/aprank>. Trained models were deposited in Dryad  
473 under DOI:10.5061/dryad.zcrjdfnb1 (<https://doi.org/10.5061/dryad.zcrjdfnb1>).

## REFERENCES

- 474 Balouz, V., Bracco, L., Ricci, A. D., Romer, G., Agüero, F., and Buscaglia, C. A. (2021). Serological  
475 Approaches for *Trypanosoma cruzi* Strain Typing. *Trends in Parasitology* 37, 214–225. doi:10.1016/j.pt.  
476 2020.12.002
- 477 Barbour, A. G., Jasinskas, A., Kayala, M. A., Davies, D. H., Steere, A. C., Baldi, P., et al. (2008).  
478 A Genome-Wide Proteome Array Reveals a Limited Set of Immunogens in Natural Infections of  
479 Humans and White-Footed Mice with *Borrelia burgdorferi*. *Infection and Immunity* 76, 3374–3389.  
480 doi:10.1128/IAI.00048-08
- 481 Beare, P. A., Chen, C., Bouman, T., Pablo, J., Unal, B., Cockrell, D. C., et al. (2008). Candidate Antigens  
482 for Q Fever Serodiagnosis Revealed by Immunoscreening of a *Coxiella burnetii* Protein Microarray.  
483 *Clinical and Vaccine Immunology* 15, 1771–1779. doi:10.1128/CVI.00300-08
- 484 Buus, S., Rockberg, J., Forsström, B., Nilsson, P., Uhlen, M., and Schafer-Nielsen, C. (2012). High-  
485 resolution mapping of linear antibody epitopes using ultrahigh-density peptide microarrays. *Mol Cell*  
486 *Proteomics* 11, 1790–1800. doi:10.1074/mcp.M112.020800
- 487 Camacho, C., Coulouris, G., Avagyan, V., Ma, N., Papadopoulos, J., Bealer, K., et al. (2009). BLAST+:  
488 architecture and applications. *BMC bioinformatics* 10, 421. doi:10.1186/1471-2105-10-421
- 489 Carmona, S., Nielsen, M., Schafer-Nielsen, C., Mucci, J., Altcheh, J., Balouz, V., et al. (2015). Towards  
490 high-throughput immunomics for infectious diseases: Use of next-generation peptide microarrays  
491 for rapid discovery and mapping of antigenic determinants. *Molecular and Cellular Proteomics* 14.  
492 doi:10.1074/mcp.M114.045906
- 493 Carmona, S., Sartor, P., Leguizamón, M., Campetella, O., and Agüero, F. (2012). Diagnostic Peptide  
494 Discovery: Prioritization of Pathogen Diagnostic Markers Using Multiple Features. *PLoS ONE* 7,  
495 e50748. doi:10.1371/journal.pone.0050748
- 496 Chen, C., Bouman, T. J., Beare, P. A., Mertens, K., Zhang, G. Q., Russell-Lodrigue, K. E., et al.  
497 (2009). A systematic approach to evaluate humoral and cellular immune responses to *Coxiella burnetii*  
498 immunoreactive antigens. *Clinical microbiology and infection : the official publication of the European*  
499 *Society of Clinical Microbiology and Infectious Diseases* 15 Suppl 2, 156–7. doi:10.1111/j.1469-0691.  
500 2008.02206.x
- 501 Dalsass, M., Brozzi, A., Medini, D., and Rappuoli, R. (2019). Comparison of open-source reverse  
502 vaccinology programs for bacterial vaccine antigen discovery. *Frontiers in immunology* 10, 113.  
503 doi:10.3389/fimmu.2019.00113
- 504 Dosztányi, Z. (2018). Prediction of protein disorder based on IUPred. *Protein science : a publication of*  
505 *the Protein Society* 27, 331–340. doi:10.1002/pro.3334
- 506 Dosztányi, Z., Csizmók, V., Tompa, P., and Simon, I. (2005). The Pairwise Energy Content Estimated  
507 from Amino Acid Composition Discriminates between Folded and Intrinsically Unstructured Proteins.  
508 *Journal of Molecular Biology* 347, 827–839. doi:10.1016/j.jmb.2005.01.071
- 509 Durante, I. M., La Spina, P. E., Carmona, S. J., Agüero, F., and Buscaglia, C. A. (2017). High-resolution  
510 profiling of linear B-cell epitopes from mucin-associated surface proteins (MASPs) of *Trypanosoma*  
511 *cruzi* during human infections. *PLoS neglected tropical diseases* 11, e0005986. doi:10.1371/journal.  
512 pntd.0005986

- 513 Eyles, J. E., Unal, B., Hartley, M. G., Newstead, S. L., Flick-Smith, H., Prior, J. L., et al.  
514 (2007). Immunodominant *Francisella tularensis* antigens identified using proteome microarray. © Crown  
515 Copyright 2007 Dstl. *PROTEOMICS* 7, 2172–2183. doi:10.1002/pmic.200600985
- 516 Holmes, P. (2014). Neglected tropical diseases in the post-2015 health agenda. *Lancet* 383, 1803.  
517 doi:10.1016/S0140-6736(14)60875-8
- 518 Julenius, K., Mølgaard, A., Gupta, R., and Brunak, S. (2005). Prediction, conservation analysis, and  
519 structural characterization of mammalian mucin-type O-glycosylation sites. *Glycobiology* 15, 153–164.  
520 doi:10.1093/glycob/cwh151
- 521 Kilmury, S. L. N. and Twine, S. M. (2010). The francisella tularensis proteome and its recognition by  
522 antibodies. *Frontiers in microbiology* 1, 143. doi:10.3389/fmicb.2010.00143
- 523 Klausen, M. S., Jespersen, M. C., Nielsen, H., Jensen, K. K., Jurtz, V. I., Sønderby, C. K., et al. (2019).  
524 NetSurfP-2.0: Improved prediction of protein structural features by integrated deep learning. *Proteins*  
525 87, 520–527. doi:10.1002/prot.25674
- 526 Krogh, A., Larsson, B., von Heijne, G., and Sonnhammer, E. L. (2001). Predicting transmembrane protein  
527 topology with a hidden markov model: application to complete genomes 1 Edited by F. Cohen. *Journal*  
528 *of Molecular Biology* 305, 567–580. doi:10.1006/jmbi.2000.4315
- 529 Lagatie, O., Van Dorst, B., and Stuyver, L. J. (2017). Identification of three immunodominant motifs with  
530 atypical isotype profile scattered over the *Onchocerca volvulus* proteome. *PLOS Neglected Tropical*  
531 *Diseases* 11, e0005330. doi:10.1371/journal.pntd.0005330
- 532 Larsen, J., Lund, O., and Nielsen, M. (2006). Improved method for predicting linear B-cell epitopes.  
533 *Immunome Research* 2, 2. doi:10.1186/1745-7580-2-2
- 534 Lawrenz, M. B., Hardham, J. M., Owens, R. T., Nowakowski, J., Steere, A. C., Wormser, G. P., et al.  
535 (1999). Human antibody responses to VlsE antigenic variation protein of *Borrelia burgdorferi*. *Journal*  
536 *of clinical microbiology* 37, 3997–4004
- 537 Lessa-Aquino, C., Borges Rodrigues, C., Pablo, J., Sasaki, R., Jasinskas, A., Liang, L., et al. (2013).  
538 Identification of Seroreactive Proteins of *Leptospira interrogans* Serovar Copenhageni Using a High-  
539 Density Protein Microarray Approach. *PLoS Neglected Tropical Diseases* 7, e2499. doi:10.1371/journal.  
540 pntd.0002499
- 541 Liang, L. and Felgner, P. L. (2012). Predicting antigenicity of proteins in a bacterial proteome; a  
542 protein microarray and naïve Bayes classification approach. *Chemistry & biodiversity* 9, 977–990.  
543 doi:10.1002/cbdv.201100360
- 544 Liang, L., Leng, D., Burk, C., Nakajima-Sasaki, R., Kayala, M. A., Atluri, V. L., et al. (2010). Large Scale  
545 Immune Profiling of Infected Humans and Goats Reveals Differential Recognition of *Brucella melitensis*  
546 Antigens. *PLoS Neglected Tropical Diseases* 4, e673. doi:10.1371/journal.pntd.0000673
- 547 Liu, E. W., Skinner, J., Tran, T. M., Kumar, K., Narum, D. L., Jain, A., et al. (2018). Protein-Specific  
548 Features Associated with Variability in Human Antibody Responses to *Plasmodium falciparum* Malaria  
549 Antigens. *The American journal of tropical medicine and hygiene* 98, 57–66. doi:10.4269/ajtmh.17-0437
- 550 Lu, Z., Roche, M. I., Hui, J. H., Unal, B., Felgner, P. L., Gulati, S., et al. (2007). Generation and  
551 characterization of hybridoma antibodies for immunotherapy of tularemia. *Immunology Letters* 112,  
552 92–103. doi:10.1016/j.imlet.2007.07.006
- 553 Lunardon, N., Menardi, G., and Torelli, N. (2014). ROSE: A Package for Binary Imbalanced Learning.  
554 *The R Journal* 6, 79–89
- 555 Martini, S., Nielsen, M., Peters, B., and Sette, A. (2020). The Immune Epitope Database and Analysis  
556 Resource Program 2003-2018: reflections and outlook. *Immunogenetics* 72, 57–76. doi:10.1007/  
557 s00251-019-01137-6

- 558 McDonnell, A. V., Jiang, T., Keating, A. E., and Berger, B. (2006). Paircoil2: improved prediction of  
559 coiled coils from sequence. *Bioinformatics* 22, 356–358. doi:10.1093/bioinformatics/bti797
- 560 Menardi, G. and Torelli, N. (2014). Training and assessing classification rules with imbalanced data. *Data*  
561 *Mining and Knowledge Discovery* 28, 92–122. doi:10.1007/s10618-012-0295-5
- 562 Mucci, J., Carmona, S. J., Volcovich, R., Altcheh, J., Bracamonte, E., Marco, J. D., et al. (2017). Next-  
563 generation ELISA diagnostic assay for chagas disease based on the combination of short peptidic  
564 epitopes. *PLoS Negl Trop Dis* 11, e0005972. doi:10.1371/journal.pntd.0005972
- 565 Newman, A. M. and Cooper, J. B. (2007). XSTREAM: A practical algorithm for identification and  
566 architecture modeling of tandem repeats in protein sequences. *BMC Bioinformatics* 8, 382. doi:10.1186/  
567 1471-2105-8-382
- 568 Nielsen, M., Justesen, S., Lund, O., Lundegaard, C., and Buus, S. (2010). NetMHCIIpan-2.0 - Improved  
569 pan-specific HLA-DR predictions using a novel concurrent alignment and weight optimization training  
570 procedure. *Immunome Research* 6, 9. doi:10.1186/1745-7580-6-9
- 571 Peeling, R. W. and Nwaka, S. (2011). Drugs and diagnostic innovations to improve global health. *Infectious*  
572 *disease clinics of North America* 25, 693–705, xi. doi:10.1016/j.idc.2011.06.002
- 573 Pellois, J. P., Zhou, X., Srivannavit, O., Zhou, T., Gulari, E., and Gao, X. (2002). Individually addressable  
574 parallel peptide synthesis on microchips. *Nat Biotechnol* 20, 922–926. doi:10.1038/nbt723
- 575 Petersen, B., Petersen, T., Andersen, P., Nielsen, M., and Lundegaard, C. (2009). A generic method for  
576 assignment of reliability scores applied to solvent accessibility predictions. *BMC Structural Biology* 9,  
577 51. doi:10.1186/1472-6807-9-51
- 578 Petersen, T. N., Brunak, S., von Heijne, G., and Nielsen, H. (2011). SignalP 4.0: discriminating signal  
579 peptides from transmembrane regions. *Nature Methods* 8, 785–786. doi:10.1038/nmeth.1701
- 580 Pierleoni, A., Martelli, P., and Casadio, R. (2008). PredGPI: a GPI-anchor predictor. *BMC Bioinformatics*  
581 9, 392. doi:10.1186/1471-2105-9-392
- 582 [Dataset] Ricci, A. and Agüero, F. (2021). Aprank release v1.0. <https://github.com/trypanosomatics/aprank>
- 583 Richer, J., Johnston, S. A., and Stafford, P. (2015). Epitope Identification from Fixed-complexity Random-  
584 sequence Peptide Microarrays. *Molecular & Cellular Proteomics* 14, 136–147. doi:10.1074/mcp.M114.  
585 043513
- 586 Robin, X., Turck, N., Hainard, A., Tiberti, N., Lisacek, F., Sanchez, J.-C., et al. (2011). pROC: an  
587 open-source package for R and S+ to analyze and compare ROC curves. *BMC bioinformatics* 12, 77.  
588 doi:10.1186/1471-2105-12-77
- 589 Sutandy, F. X. R., Qian, J., Chen, C.-S., and Zhu, H. (2013). Overview of protein microarrays. *Current*  
590 *protocols in protein science* Chapter 27, Unit 27.1. doi:10.1002/0471140864.ps2701s72
- 591 Vainionpää, R. and Leinikki, P. (2008). Diagnostic Techniques: Serological and Molecular Approaches.  
592 *Encyclopedia of Virology*, 29–37doi:10.1016/B978-012374410-4.00585-9
- 593 Vigil, A., Chen, C., Jain, A., Nakajima-Sasaki, R., Jasinskas, A., Pablo, J., et al. (2011). Profiling the  
594 Humoral Immune Response of Acute and Chronic Q Fever by Protein Microarray. *Molecular & Cellular*  
595 *Proteomics* 10, M110.006304. doi:10.1074/mcp.M110.006304
- 596 Vita, R., Mahajan, S., Overton, J. A., Dhanda, S. K., Martini, S., Cantrell, J. R., et al. (2019). The Immune  
597 Epitope Database (IEDB): 2018 update. *Nucleic Acids Research* 47, D339–D343. doi:10.1093/nar/  
598 gky1006
- 599 Wang, X., Xiong, X., Graves, S., Stenos, J., and Wen, B. (2013). Protein array of Coxiella burnetii probed  
600 with Q fever sera. *Science China Life Sciences* 56, 453–459. doi:10.1007/s11427-013-4472-6
- 601 Washington, J. A. (1996). Principles of diagnosis. In *Medical Microbiology*, ed. S. Baron (Galveston,  
602 TX: University of Texas Medical Branch at Galveston), chap. 10. 4th edn. Available from:

- 603 <https://www.ncbi.nlm.nih.gov/books/NBK8014/>
- 604 Xiong, X., Wang, X., Wen, B., Graves, S., and Stenos, J. (2012). Potential serodiagnostic markers for Q
- 605 fever identified in *Coxiella burnetii* by immunoproteomic and protein microarray approaches. *BMC*
- 606 *Microbiology* 12, 35. doi:10.1186/1471-2180-12-35
- 607 Xu, Y., Bruno, J. F., and Luft, B. J. (2008). Profiling the humoral immune response to *Borrelia burgdorferi*
- 608 infection with protein microarrays. *Microbial Pathogenesis* 45, 403–407. doi:10.1016/j.micpath.2008.
- 609 09.006



610 4.3 Tables

**Table 1. List of pathogen species used in this paper.**

| <b>Pathogen Species</b>           | <b>Disease</b>      | <b>Group</b>           | <b>Phylogenetic Lineage</b> |
|-----------------------------------|---------------------|------------------------|-----------------------------|
| <i>Borrelia burgdorferi</i>       | Lyme disease        | Gram Negative Bacteria | Spirochaetes                |
| <i>Brucella melitensis</i>        | Brucellosis         |                        | Alpha-proteobacteria        |
| <i>Coxiella burnetii</i>          | Q fever             |                        | Gamma-proteobacteria        |
| <i>Escherichia coli</i>           | Gastroenteritis     |                        | Enterobacteria              |
| <i>Francisella tularensis</i>     | Tularemia           |                        | Gamma-proteobacteria        |
| <i>Leptospira interrogans</i>     | Leptospirosis       |                        | Spirochaetes                |
| <i>Porphyromonas gingivalis</i>   | Periodontal disease |                        | Sphingobacteria             |
| <i>Mycobacterium leprae</i>       | Leprosy             | Gram Positive Bacteria | Actinobacteria              |
| <i>Mycobacterium tuberculosis</i> | Tuberculosis        |                        | Actinobacteria              |
| <i>Staphylococcus aureus</i>      | Bacteremia          |                        | Firmicutes                  |
| <i>Streptococcus pyogenes</i>     | GAS infections      |                        | Firmicutes                  |
| <i>Leishmania braziliensis</i>    | Leishmaniasis       | Eukaryotic Protozoa    | Kinetoplastida              |
| <i>Plasmodium falciparum</i>      | Malaria             |                        | Apicomplexa                 |
| <i>Toxoplasma gondii</i>          | Toxoplasmosis       |                        | Apicomplexa                 |
| <i>Trypanosoma cruzi</i>          | Chagas Disease      |                        | Kinetoplastida              |

**Table 2. Predictors used to analyze different features of proteins and peptides.** CrossReactivity and SelfSimilarity are custom Perl scripts. Acronyms used: ANN (Artificial Neural Network), HMM (Hidden Markov Model), SE (Seed Extension), SVM (Support Vector Machine).

| Focus                                        | Feature                                 | Predictor                 | Basis                                                                                                                 |
|----------------------------------------------|-----------------------------------------|---------------------------|-----------------------------------------------------------------------------------------------------------------------|
| Stimulation of an immune response            | B-cell epitopes                         | BepiPred 1.0              | Antigenicity by HMM                                                                                                   |
|                                              | Binding to MHC Class II molecules       | NetMHCIIpan 2.0           | ANN trained with peptide and MHC Class II sequence information                                                        |
| Peculiarities in the protein sequence        | Glycosylation sites                     | NetOglyc 3.1d             | ANN trained with mucin type GalNAc O-glycosylation sites in mammalian proteins                                        |
|                                              | GPI-anchored proteins                   | PredGPI 1.4.3             | Discrimination of the anchoring signal by SVM and prediction of the most probable omega-site by HMM                   |
|                                              | Signal peptide cleavage sites           | SignalP 4.0               | Prediction of cleavage sites and a signal peptide/non-signal peptide prediction based on a combination of several ANN |
|                                              | Tandem repeats                          | Xstream 1.71              | SE algorithm to explicitly locate exact and degenerate tandem repeats TRs of all periods in protein sequences         |
| Three dimensional structure                  | Disorder                                | Iupred 1.0                | Aminoacids favorable interactions potential                                                                           |
|                                              | Parallel coiled coil fold               | Paircoil2                 | Uses pairwise residue probabilities with the Paircoil algorithm and an updated coiled coil database                   |
|                                              | Secondary Structure                     | NetSurfp 1.0              | ANN trained with sequence profiles and predicted secondary structure                                                  |
|                                              | Surface access                          | NetSurfp 1.0              | ANN trained to predict the relative surface exposure of the individual amino acid residues                            |
|                                              | Transmembrane helices in proteins       | TMHMM 2.0c                | Membrane protein topology prediction method based on a HMM                                                            |
| Molecular properties                         | Isoelectric point                       | Pepstats (EMBOSS 6.6.0.0) | Amino acids pK values                                                                                                 |
|                                              | Molecular Weight                        | Pepstats (EMBOSS 6.6.0.0) | Amino acids weights                                                                                                   |
| Similarities within itself and with the host | Sequence similarity (pathogen / host)   | CrossReactivity           | Shared kmers between pathogen and host proteins                                                                       |
|                                              | Sequence similarity (pathogen proteins) | SelfSimilarity            | Shared kmers between pathogen proteins                                                                                |

**Table 3. Amount of antigenic proteins and peptides for each species.** This table shows the amount of antigenic proteins and sequences extracted from bibliography (to the left of the arrow) and the final amount after processing (to the right of the arrow). For proteins, BLAST was used to also tag as antigenic other proteins of the same species that were similar to the antigenic ones. For peptides, a custom mapping method named 'kmer expansion' was used to tag peptides as antigenic based on the antigenic sequences in bibliography (see Methods). We did not have information at peptide level for three of the species.

| Species                | Group     | Proteins |             | Peptides   |               |
|------------------------|-----------|----------|-------------|------------|---------------|
|                        |           | Total    | Antigenic   | Total      | Antigenic     |
| <i>B. burgdorferi</i>  | Gram -    | 1,390    | 137 → 152   | 386,683    | 117 → 863     |
| <i>B. melitensis</i>   | Gram -    | 3,178    | 13 → 13     | -          | -             |
| <i>C. burnetii</i>     | Gram -    | 1,853    | 102 → 104   | -          | -             |
| <i>E. coli</i>         | Gram -    | 4,778    | 7 → 7       | 1,428,744  | 9 → 158       |
| <i>F. tularensis</i>   | Gram -    | 1,556    | 27 → 27     | -          | -             |
| <i>L. interrogans</i>  | Gram -    | 3,683    | 10 → 10     | 1,113,309  | 19 → 342      |
| <i>P. gingivalis</i>   | Gram -    | 1,881    | 10 → 11     | 626,536    | 165 → 1,181   |
| <i>M. leprae</i>       | Gram +    | 1,605    | 7 → 8       | 515,942    | 76 → 633      |
| <i>M. tuberculosis</i> | Gram +    | 3,940    | 81 → 89     | 1,268,272  | 416 → 4,369   |
| <i>S. aureus</i>       | Gram +    | 2,607    | 16 → 16     | 758,970    | 55 → 575      |
| <i>S. pyogenes</i>     | Gram +    | 1,690    | 13 → 13     | 491,619    | 263 → 985     |
| <i>L. braziliensis</i> | Eukaryote | 8,084    | 8 → 12      | 4,964,396  | 14 → 182      |
| <i>P. falciparum</i>   | Eukaryote | 5,337    | 106 → 131   | 4,009,580  | 562 → 9,120   |
| <i>T. gondii</i>       | Eukaryote | 8,322    | 15 → 16     | 6,535,220  | 94 → 457      |
| <i>T. cruzi</i>        | Eukaryote | 21,170   | 242 → 2,480 | 10,408,841 | 4,025 → 7,317 |

**Table 4. Prediction results for the specific models.** The prediction was considered to be successful if it was significantly Better Than a Random set of scores (BTR). Each specific model was calculated 50 times using different, but overlapping, subsets of data as training and test sets. In bold we show the model with the significantly higher AUC when comparing training with unbalanced or balanced data (Student's t-test, \* < 0.05, \*\* < 0.01, \*\*\* < 0.001).

| Species                | Proteins  |                              |                            | Peptides  |                              |                            |
|------------------------|-----------|------------------------------|----------------------------|-----------|------------------------------|----------------------------|
|                        | BTR       | Trained with unbalanced data | Trained with balanced data | BTR       | Trained with unbalanced data | Trained with balanced data |
|                        |           | Mean AUC                     | Mean AUC                   |           | Mean AUC                     | Mean AUC                   |
| <i>B. burgdorferi</i>  | Yes       | 0.809 ± 0.014                | 0.799 ± 0.017              | Yes       | 0.767 ± 0.021                | 0.773 ± 0.020              |
| <i>B. melitensis</i>   | Yes       | 0.710 ± 0.037                | 0.700 ± 0.033              | -         | -                            | -                          |
| <i>C. burnetii</i>     | Yes       | 0.611 ± 0.011                | 0.620 ± 0.010              | -         | -                            | -                          |
| <i>E. coli</i>         | <b>No</b> | 0.511 ± 0.034                | 0.515 ± 0.039              | Yes       | 0.584 ± 0.056                | 0.633 ± 0.047              |
| <i>F. tularensis</i>   | Yes       | 0.783 ± 0.018                | <b>0.807 ± 0.014*</b>      | -         | -                            | -                          |
| <i>L. interrogans</i>  | Yes       | 0.827 ± 0.033                | 0.867 ± 0.023              | Yes       | 0.559 ± 0.015                | 0.565 ± 0.011              |
| <i>P. gingivalis</i>   | Yes       | 0.785 ± 0.031                | <b>0.879 ± 0.015***</b>    | Yes       | 0.690 ± 0.019                | 0.698 ± 0.020              |
| <i>M. leprae</i>       | Yes       | 0.633 ± 0.018                | 0.652 ± 0.018              | Yes       | 0.557 ± 0.029                | 0.585 ± 0.023              |
| <i>M. tuberculosis</i> | Yes       | 0.635 ± 0.010                | 0.647 ± 0.011              | <b>No</b> | 0.508 ± 0.010                | 0.502 ± 0.010              |
| <i>S. aureus</i>       | Yes       | 0.765 ± 0.032                | 0.772 ± 0.023              | <b>No</b> | 0.438 ± 0.054                | 0.420 ± 0.057              |
| <i>S. pyogenes</i>     | Yes       | 0.884 ± 0.039                | <b>0.984 ± 0.003***</b>    | Yes       | 0.832 ± 0.021                | 0.844 ± 0.019              |
| <i>L. braziliensis</i> | Yes       | <b>0.719 ± 0.021**</b>       | 0.673 ± 0.020              | Yes       | 0.778 ± 0.029                | <b>0.867 ± 0.025***</b>    |
| <i>P. falciparum</i>   | Yes       | 0.821 ± 0.009                | 0.826 ± 0.007              | Yes       | 0.758 ± 0.016                | <b>0.779 ± 0.012*</b>      |
| <i>T. gondii</i>       | Yes       | 0.656 ± 0.032                | <b>0.744 ± 0.032***</b>    | Yes       | <b>0.646 ± 0.035**</b>       | 0.584 ± 0.020              |
| <i>T. cruzi</i>        | Yes       | 0.803 ± 0.029                | <b>0.850 ± 0.022*</b>      | Yes       | 0.838 ± 0.019                | 0.854 ± 0.016              |



**Table 5. Prediction results for the leave-one-out generic models.** The prediction was considered successful if it was significantly Better Than a Random set of scores (BTR). For peptides, we show both the performance of the model alone, and the performance obtained by combining the protein and peptide scores. In bold we show any difference greater than 5% between the peptide score and the combined score for a given species. LOO Model = Leave-One-Out Model.

| Species                | Proteins |           | Peptides |           |                            |                                  |
|------------------------|----------|-----------|----------|-----------|----------------------------|----------------------------------|
|                        | BTR      | LOO model | BTR      | LOO model | LOO model + protein scores | Combined score relative AUC gain |
| <i>B. burgdorferi</i>  | Yes      | 0.786     | Yes      | 0.768     | 0.950                      | <b>23.60%</b>                    |
| <i>B. melitensis</i>   | Yes      | 0.774     | -        | -         | -                          | -                                |
| <i>C. burnetii</i>     | Yes      | 0.620     | -        | -         | -                          | -                                |
| <i>E. coli</i>         | Yes      | 0.754     | Yes      | 0.742     | 0.780                      | <b>5.12%</b>                     |
| <i>F. tularensis</i>   | Yes      | 0.698     | -        | -         | -                          | -                                |
| <i>L. interrogans</i>  | Yes      | 0.947     | Yes      | 0.679     | 0.948                      | <b>39.57%</b>                    |
| <i>P. gingivalis</i>   | Yes      | 0.854     | Yes      | 0.665     | 0.871                      | <b>30.91%</b>                    |
| <i>M. leprae</i>       | Yes      | 0.758     | Yes      | 0.692     | 0.731                      | <b>5.68%</b>                     |
| <i>M. tuberculosis</i> | Yes      | 0.702     | Yes      | 0.586     | 0.711                      | <b>21.17%</b>                    |
| <i>S. aureus</i>       | Yes      | 0.737     | Yes      | 0.752     | 0.790                      | <b>5.03%</b>                     |
| <i>S. pyogenes</i>     | Yes      | 0.983     | Yes      | 0.838     | 0.970                      | <b>15.81%</b>                    |
| <i>L. braziliensis</i> | Yes      | 0.709     | Yes      | 0.946     | 0.878                      | <b>-7.20%</b>                    |
| <i>P. falciparum</i>   | Yes      | 0.807     | Yes      | 0.748     | 0.835                      | <b>11.66%</b>                    |
| <i>T. gondii</i>       | Yes      | 0.837     | Yes      | 0.583     | 0.720                      | <b>23.51%</b>                    |
| <i>T. cruzi</i>        | Yes      | 0.867     | Yes      | 0.843     | 0.857                      | 1.58%                            |

**Table 6. Comparison between APRANK and the predictor with highest solo AUC (BepiPred 1.0).** The relative AUC gain shows the increase or decrease of the AUC obtained by our method relative to the one obtained by BepiPred. Differences greater than 5% are shown in bold.

| Species         | Proteins           |                  |                          | Peptides           |                  |                          |
|-----------------|--------------------|------------------|--------------------------|--------------------|------------------|--------------------------|
|                 | BepiPred score AUC | APRANK score AUC | APRANK relative AUC gain | BepiPred score AUC | APRANK score AUC | APRANK relative AUC gain |
| B. burgdorferi  | 0.729              | <b>0.786</b>     | <b>7.94%</b>             | 0.796              | 0.768            | -3.46%                   |
| B. melitensis   | 0.710              | <b>0.774</b>     | <b>8.93%</b>             | -                  | -                | -                        |
| C. burnetii     | 0.558              | <b>0.620</b>     | <b>11.13%</b>            | -                  | -                | -                        |
| E. coli         | 0.587              | <b>0.754</b>     | <b>28.39%</b>            | 0.662              | <b>0.742</b>     | <b>12.21%</b>            |
| F. tularensis   | 0.570              | <b>0.698</b>     | <b>22.40%</b>            | -                  | -                | -                        |
| L. interrogans  | 0.839              | <b>0.947</b>     | <b>12.87%</b>            | 0.676              | 0.679            | 0.42%                    |
| P. gingivalis   | 0.852              | 0.854            | 0.25%                    | 0.674              | 0.665            | -1.36%                   |
| M. leprae       | <b>0.868</b>       | 0.758            | <b>-12.67%</b>           | 0.689              | 0.692            | 0.51%                    |
| M. tuberculosis | 0.666              | <b>0.702</b>     | <b>5.29%</b>             | 0.561              | 0.586            | 4.58%                    |
| S. aureus       | 0.723              | 0.737            | 1.86%                    | 0.767              | 0.752            | -1.93%                   |
| S. pyogenes     | 0.970              | 0.983            | 1.33%                    | 0.8                | 0.838            | 4.73%                    |
| L. braziliensis | 0.549              | <b>0.709</b>     | <b>29.00%</b>            | 0.905              | 0.946            | 4.48%                    |
| P. falciparum   | 0.793              | 0.807            | 1.84%                    | 0.642              | <b>0.748</b>     | <b>16.42%</b>            |
| T. gondii       | 0.579              | <b>0.837</b>     | <b>44.59%</b>            | 0.584              | 0.583            | -0.21%                   |
| T. cruzi        | 0.814              | <b>0.867</b>     | <b>6.54%</b>             | 0.819              | 0.843            | 3.03%                    |

**Table 7. Performance of APRANK on *Onchocerca volvulus*.** Proteins and peptides were tagged as antigenic based on the number of Minimum Immunoreactive Peptides (#MIP). For proteins, we considered as antigenic those with at least #MIP immunoreactive peptides. For peptides, we considered as antigenic any immunoreactive peptide found inside proteins with at least #MIP immunoreactive peptides, and their neighboring peptides. The rule to define an ‘immunoreactive peptide’ was extracted from Lagatie et al. 2017 (see Methods). The enrichment score represents the proportion of antigens in the selected subset relative to the proportion of antigens in the whole proteome.

|                 | Total     | Score          | #MIP | Antigenic      | AUC   | Antigens with score > 0.6 | Enrichment score for 0.6 |
|-----------------|-----------|----------------|------|----------------|-------|---------------------------|--------------------------|
| <b>Proteins</b> | 12,994    | Protein score  | 1    | 886            | 0.677 | 150                       | 2.28                     |
|                 |           |                | 2    | 177            | 0.713 | 38                        | 2.89                     |
|                 |           |                | 3    | 28             | 0.828 | 11                        | 5.29                     |
| <b>Peptides</b> | 4,872,082 | Peptide score  | 1    | 1,097 → 12,917 | 0.800 | 5,520                     | 3.29                     |
|                 |           |                | 2    | 397 → 4,145    | 0.798 | 1,779                     | 3.30                     |
|                 |           |                | 3    | 104 → 1,107    | 0.836 | 547                       | 3.80                     |
|                 |           | Combined score | 1    | 1,097 → 12,917 | 0.750 | 3,035                     | 3.05                     |
|                 |           |                | 2    | 397 → 4,145    | 0.774 | 1,189                     | 3.73                     |
|                 |           |                | 3    | 104 → 1,107    | 0.871 | 478                       | 5.61                     |

FIGURE CAPTIONS

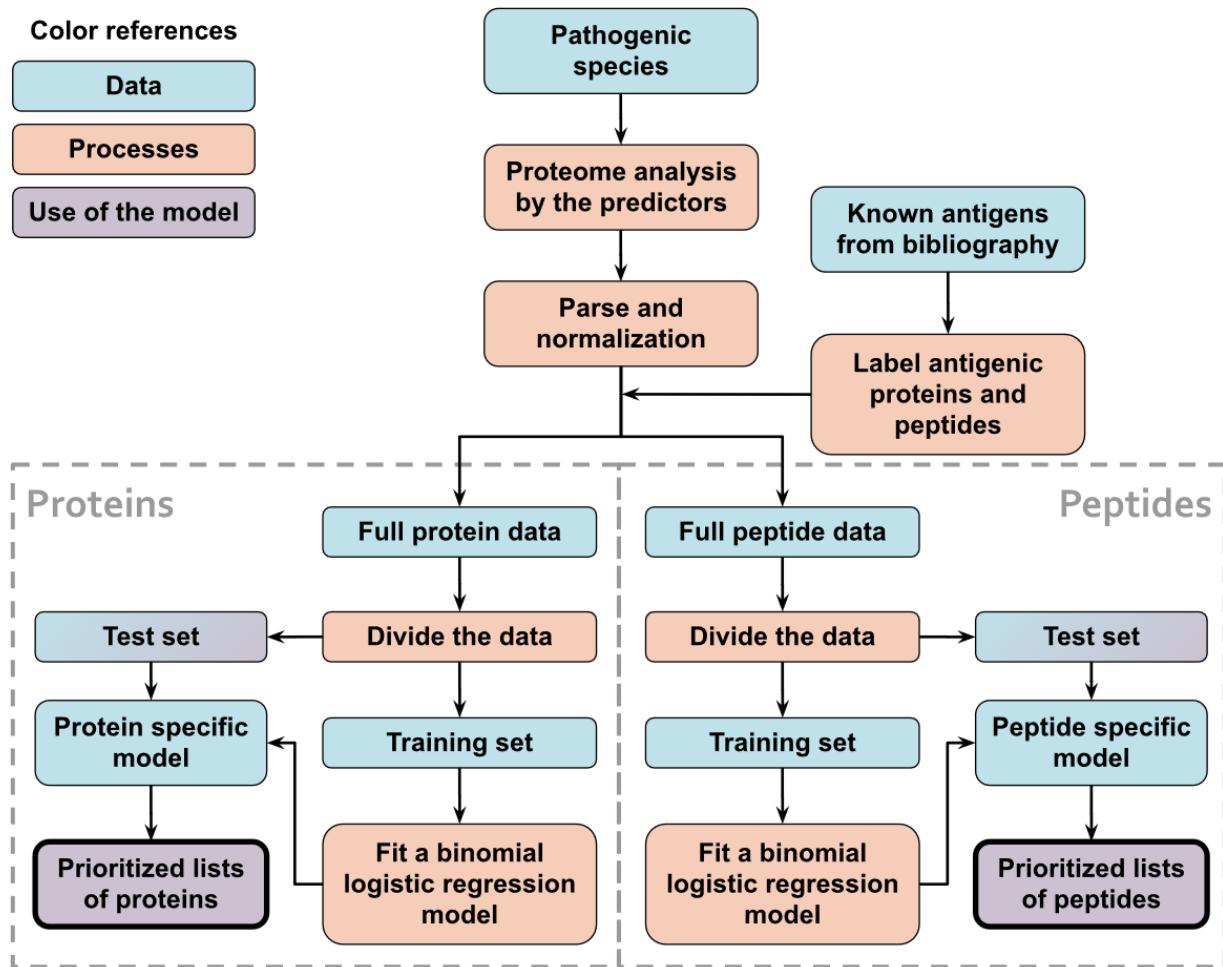

**Figure 1. Schematic flowchart used to obtain APRANK’s species-specific models.** With the aim of testing and tuning our method, training and prioritization was performed for both proteins and peptides using data from a single proteome of interest. This process was repeated for all of our 15 species.

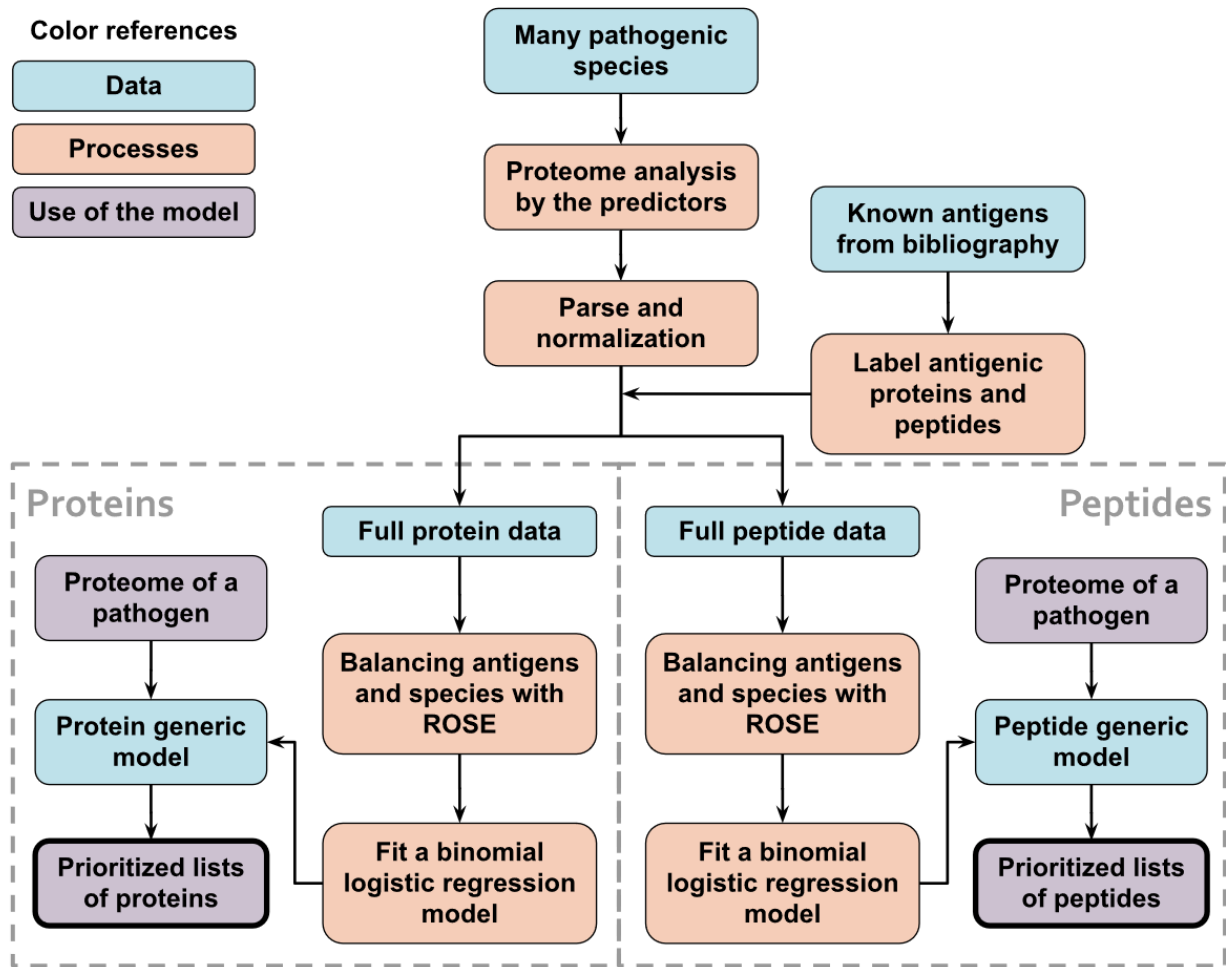

**Figure 2. Schematic flowchart used to obtain APRANK's generic models.** With the aim of creating a model that could make predictions for a wide range of species, training and prioritization was performed for both proteins and peptides using combined data from all of our 15 species. When testing these models, leave-one-out models were used, where 14 species were used to train the model and the 15th species to test it. This process was repeated for all of our 15 species.

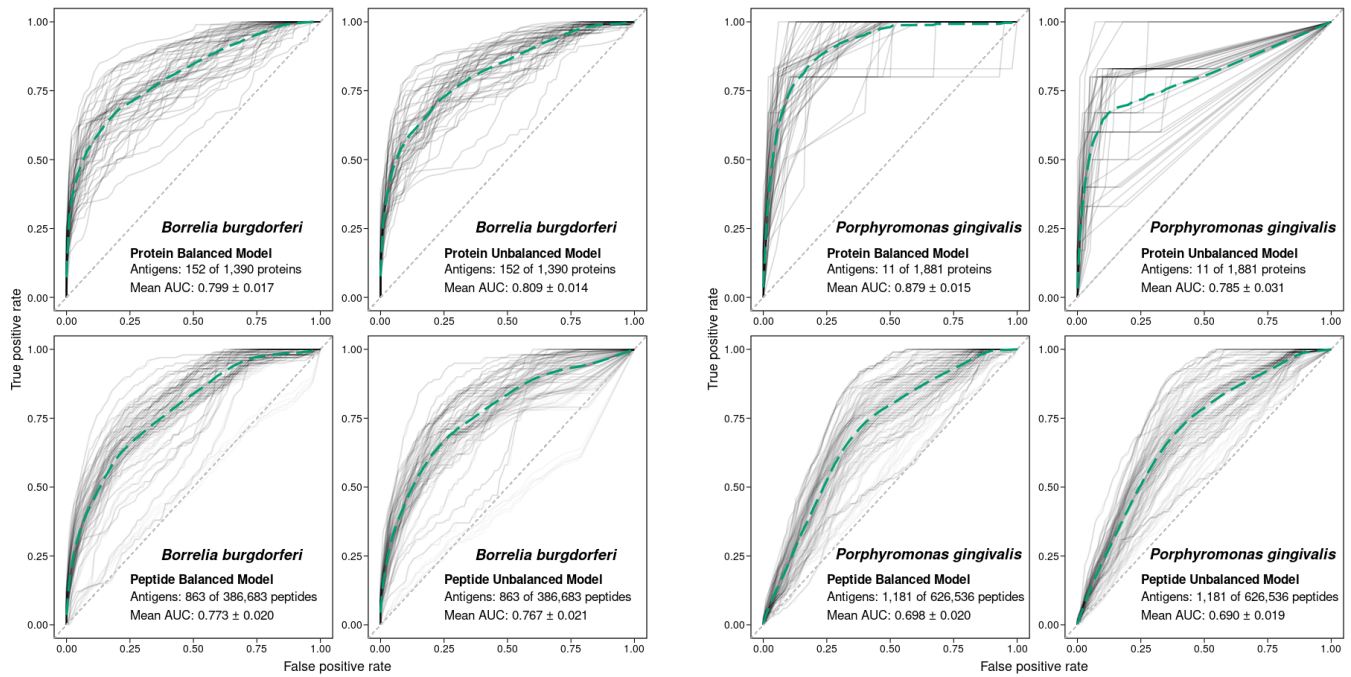

**Figure 3. Performance of APRANK training using balanced or unbalanced data.** Performance of APRANK’s species-specific models for *B. burgdorferi* and *P. gingivalis*. ROC curves for each iteration of training and testing are shown in light gray, and the average curves are shown in green (dashed lines).

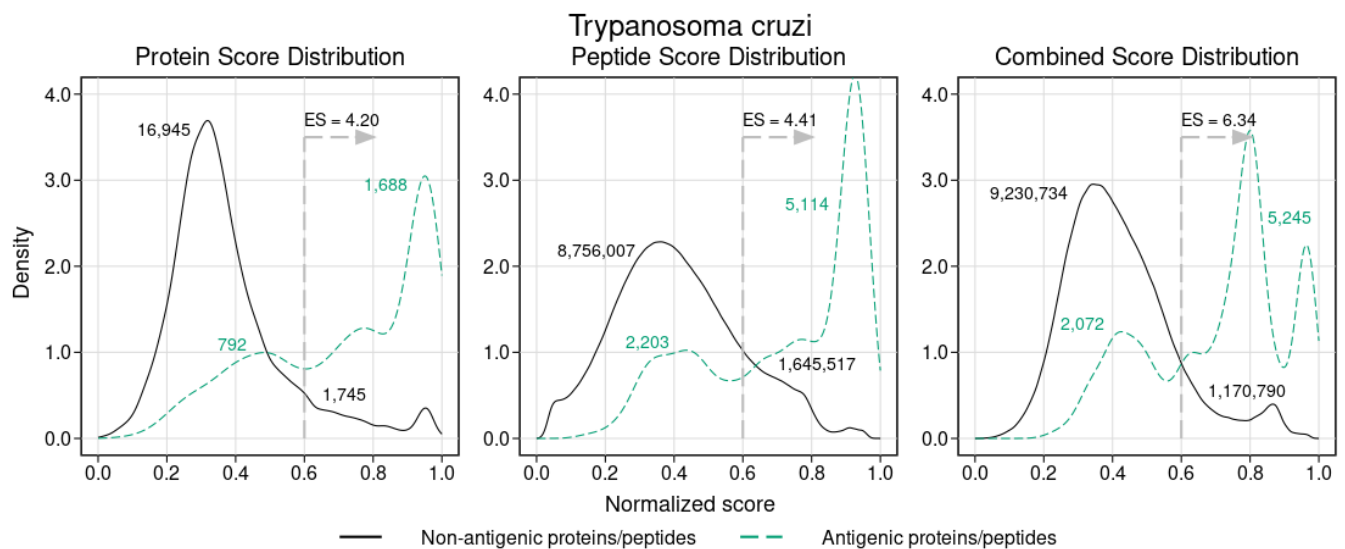

**Figure 4. Density analysis for the antigenicity scores of *T. cruzi*.** Plots were obtained by analyzing the proteome of *T. cruzi* with the leave-one-out generic models, and then distinguishing between antigens and non-antigens. The figure shows the enrichment score obtained by keeping only the proteins and peptides with a score greater than 0.6, as well as the amount of antigens and non-antigens that would be inside or outside that subset.



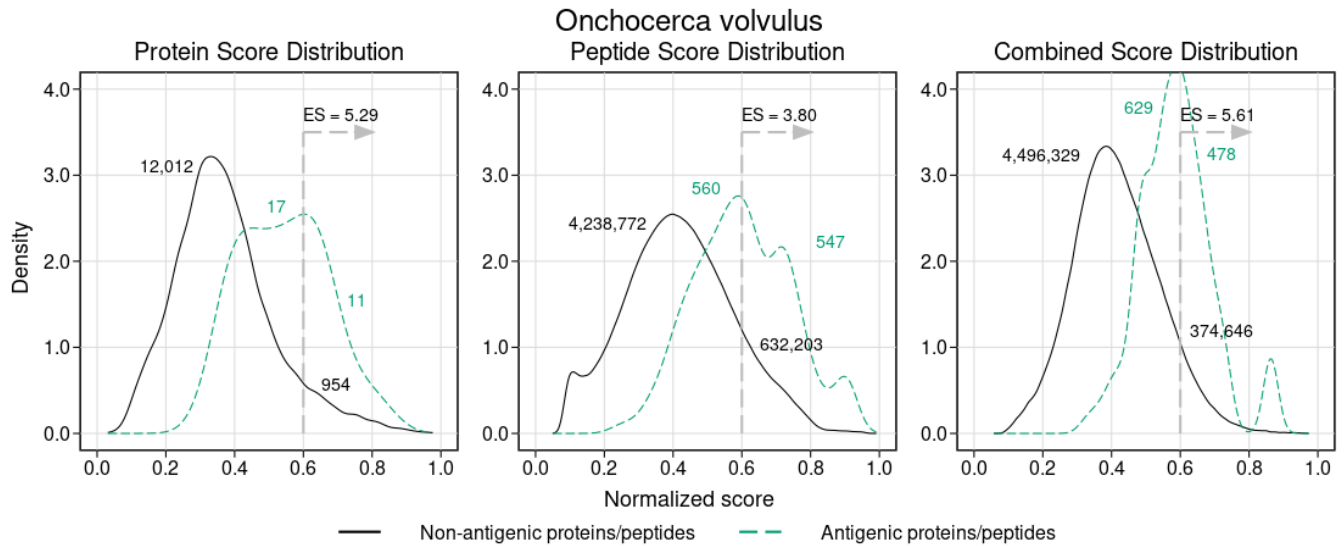

**Figure 5. Density analysis for the antigenicity scores of *Onchocerca volvulus*.** Plots were obtained by analyzing the proteome of *O. volvulus* with the final generic models, and then distinguishing between antigens and non-antigens. The figure shows the enrichment score obtained by keeping only the proteins and peptides with a score greater than 0.6, as well as the amount of antigens and non-antigens that would be inside or outside that subset. The plots correspond to the case where a protein was tagged as antigenic if it had at least 3 ‘immunoreactive’ peptides (see Results).

# Supplementary Material

## 1 SUPPLEMENTARY DATA

Antigenic Proteins and Peptides used in this study were submitted separately as Supplementary Material. The corresponding file is an Excel spreadsheet containing complete listing of antigenic sources (proteins, peptides), their Uniprot and/or RefSeq identifiers and the corresponding mapping to our input sources (complete proteomes). File: ricci-aprank-supplementary-data.xlsx.

## 2 SUPPLEMENTARY TABLES AND FIGURES

### 2.1 Figures

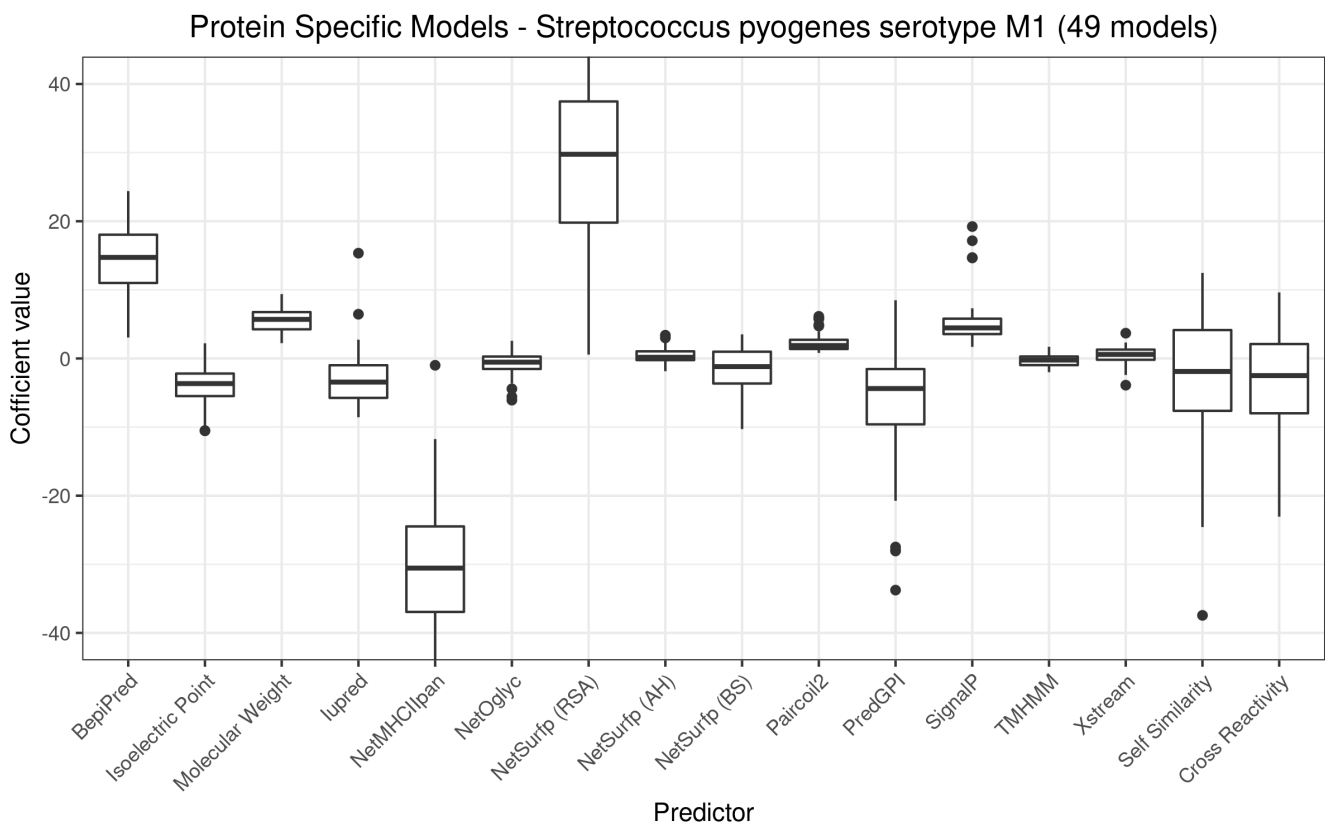

**Figure S1. Coefficient values for the species-specific models for *Streptococcus pyogenes* serotype M1.** Plots were obtained by recording the coefficient of each predictor in the binomial logistic regression models. These protein models correspond to the different species-specific models created when re-sampling training and test sets. One of the 50 models didn't converge before reaching the maximum iteration limit when training, and so wasn't considered.

**Antigenic Protein and Peptide Ranker**

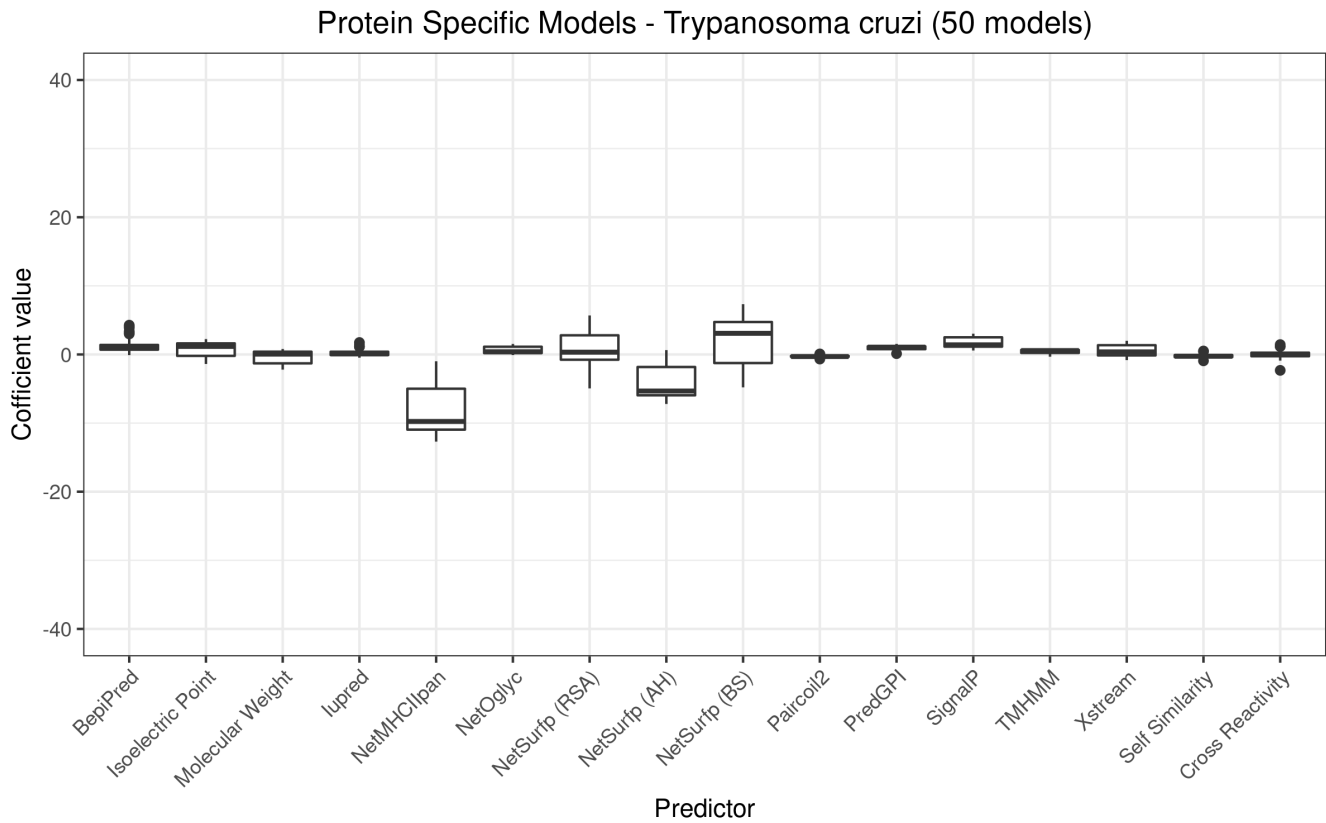

**Figure S2. Coefficient values for the species-specific models for *Trypanosoma cruzi*.** Plots were obtained by recording the coefficient of each predictor in the binomial logistic regression models. Different protein models correspond to the species-specific models created in each iteration when re-sampling training and test sets. All 50 models converged before reaching the maximum iteration limit when training.

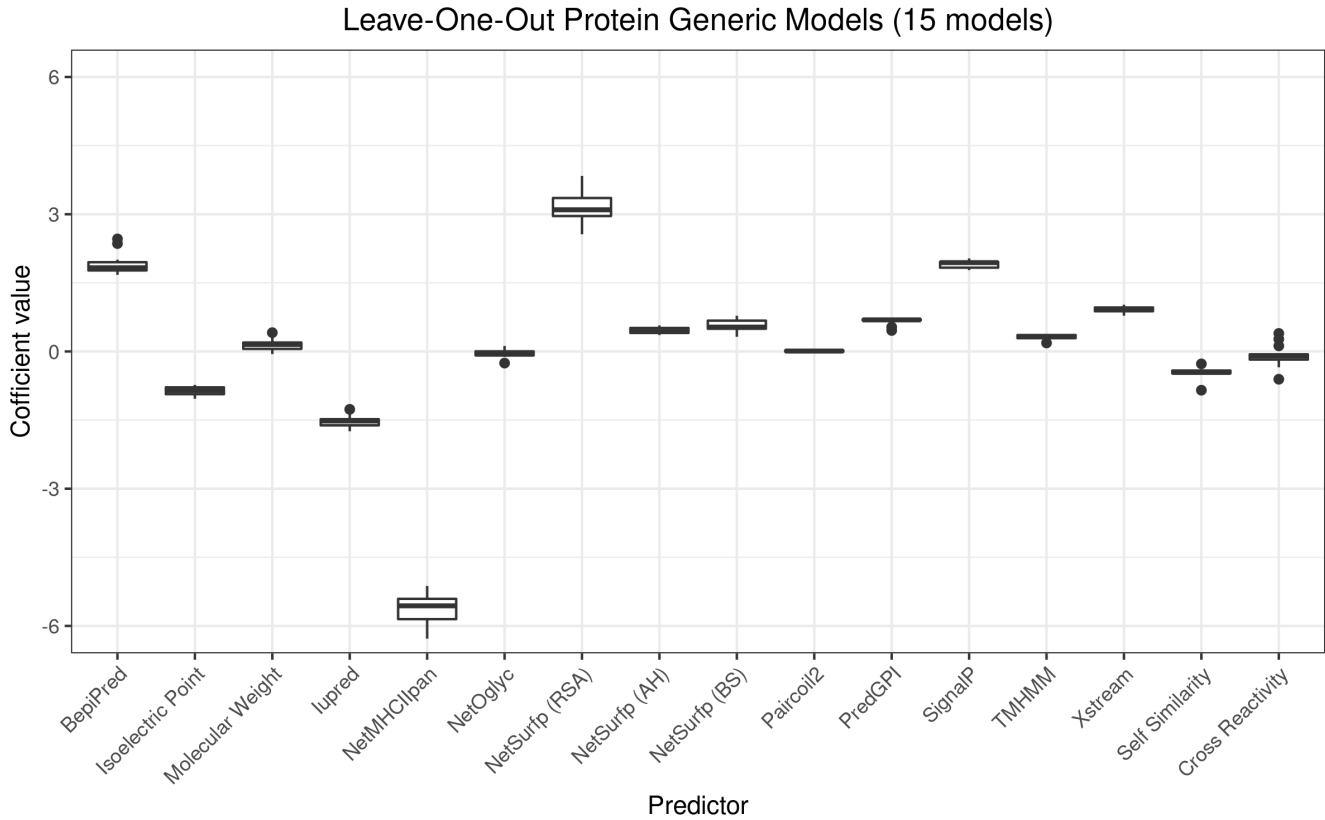

**Figure S3. Coefficient values for the leave-one-out generic models.** Plots were obtained by recording the coefficient of each predictor in the binomial logistic regression models. The different protein models correspond to each of the 15 leave-out-out generic models used to test APRANK. All 15 models converged before reaching the maximum iteration limit when training.

## 2.2 Tables

**Table S1. Versions testing things of the software, packages and modules used to create our computational method.**

| Software              | Version  |
|-----------------------|----------|
| Ubuntu                | 16.04    |
| R                     | 3.4.3    |
| ROSE (R package)      | 0.0.3    |
| pROC (R package)      | 1.12.1   |
| Perl                  | 5.22.1   |
| BioPerl (Perl module) | 1.007002 |



**Table S2. Third-party software used to retrieve information about the proteins and peptides.** The call being shown corresponds to those to use under Ubuntu 16.04. Words starting with \$ symbolize variables to be replaced by their corresponding values.

| <b>Predictor</b> | <b>Call</b>                                                                                                                                | <b>Data extracted</b>                                                                                      |
|------------------|--------------------------------------------------------------------------------------------------------------------------------------------|------------------------------------------------------------------------------------------------------------|
| BepiPred 1.0     | bepipred \$fasta_file -k >\$output_file                                                                                                    | Score per amino acid                                                                                       |
| BLAST+ 2.2.31    | blastp -query \$query_file -db \$db_file<br>-outfmt 6 -out \$output_file<br>-max_target_seqs 2000                                          | Similarity between proteins (used to assign protein antigenicity)                                          |
| EMBOSS 6.6.0.0   | pepstats -sequence \$sequence_file<br>-sprotein1 -aadata Eamino.dat -mwdata<br>Emolwt.dat -termini -nomono -auto<br>-outfile \$output_file | Isoelectric Point and Molecular Weight per protein                                                         |
| Iupred 1.0       | iupred \$sequence_file short >\$output_file                                                                                                | Score per amino acid                                                                                       |
| NetMHCIIpan 2.0  | netMHCIIpan -a \$allele -f \$sequence_file<br>-l \$peptide_length >\$output_file                                                           | %Rank per peptide per MHC II allele used                                                                   |
| NetOglyc 3.1d    | netOglyc \$sequence_file >\$output_file                                                                                                    | Glycosilation presence per amino acid                                                                      |
| NetSurfp 1.0     | NetSurfp \$sequence_file -a >\$output_file                                                                                                 | Relative Surface Accessibility, Probability for Alpha-Helix and Probability for Beta-strand per amino acid |
| Paircoil2        | paircoil2 \$fasta_file \$output_file \$error_file                                                                                          | P-score per amino acid                                                                                     |
| PredGPI 1.4.3    | PredGPI.py \$filtered_fasta_file<br>>\$output_file                                                                                         | Presence and start of GPI per protein                                                                      |
| SignalP 4.0      | signalp -f long -t \$organism_group<br>\$fasta_file \$output_file                                                                          | Presence and start of signal peptide per protein and C and S score per amino acid                          |
| TMHMM 2.0c       | tmhmm \$fasta_file >\$output_file                                                                                                          | Presence of transmembrane helix per protein and amino acid participation in it per amino acid              |
| Xstream 1.71     | java -jar \$Xstream_path/xstream.jar<br>\$sequence_file -d\$output_path/                                                                   | Start, end, period, copy number and consensus error per repeat per protein                                 |

**Antigenic Protein and Peptide Ranker**

**Table S3. Normalization methods used for each predictor in protein and peptide analysis.** The formulas mentioned are shown in the supplementary materials.

| Predictor's output     | Protein                                                                                                                                                                                           | Peptide                                                                                                                                                                                                 |
|------------------------|---------------------------------------------------------------------------------------------------------------------------------------------------------------------------------------------------|---------------------------------------------------------------------------------------------------------------------------------------------------------------------------------------------------------|
| BepiPred               | Calculate the mean of the BepiPred score for the amino acids inside the protein and normalize it using fixedLinearNormalization with -1.5 and 1.5 as limits                                       | Calculate the mean of the BepiPred score for the amino acids inside the peptide and normalize it using fixedLinearNormalization with -1.5 and 1.5 as limits                                             |
| Isoelectric Point      | Divide the isoelectric point value by 14                                                                                                                                                          | -                                                                                                                                                                                                       |
| Molecular Weight       | Normalize the molecular weight value using sigmoidNormalization05 with a b of 30,000.                                                                                                             | -                                                                                                                                                                                                       |
| Iupred                 | Calculate the ratio of amino acids inside the protein with an score greater or equal than 0.5                                                                                                     | Calculate the ratio of amino acids inside the peptide with an score greater or equal than 0.5                                                                                                           |
| NetMHCIIpan            | Calculate the mean of the ranks for the kmers inside the protein, divide it by 100, normalize it using fixedLinearNormalization with 0.05 and 0.5 as limits, and then subtract that number from 1 | Calculate the mean of the ranks for the kmers inside the peptide, divide it by 100, normalize it using fixedLinearNormalization with 0.05 and 0.5 as limits, and then subtract that number from 1       |
| NetOglyc               | Calculate the ratio of glycosylated amino acids inside the protein, and normalize it using fixedLinearNormalization with 0 and 0.05 as limits                                                     | Check if the peptide has at least 1 glycosylated residue                                                                                                                                                |
| NetSurfp (RSA)         | Calculate the mean of the values for the amino acids inside the protein                                                                                                                           | Calculate the mean of the values for the amino acids inside the peptide                                                                                                                                 |
| NetSurfp (Alpha Helix) | Calculate the mean of the values for the amino acids inside the protein                                                                                                                           | Calculate the mean of the values for the amino acids inside the peptide                                                                                                                                 |
| NetSurfp (Beta Strand) | Calculate the mean of the values for the amino acids inside the protein                                                                                                                           | Calculate the mean of the values for the amino acids inside the peptide                                                                                                                                 |
| Paircoil2              | Check if the protein has an amino acid sequence of a given length (50 by default) where all the amino acids has a score above a threshold (0.5 by default)                                        | Calculate the ratio of amino acids inside the peptide with a score above a threshold (0.5 by default)                                                                                                   |
| PredGPI                | Check if the protein has a GPI                                                                                                                                                                    | Check if the peptide is at least in part inside the GPI                                                                                                                                                 |
| SignalP                | Check if the protein has a signal peptide                                                                                                                                                         | Check if the peptide is at least in part inside the signal peptide                                                                                                                                      |
| TMHMM                  | Use the output as it is                                                                                                                                                                           | Check if the peptide is at least in part inside a transmembrane helix                                                                                                                                   |
| Xstream                | Find the largest copy number in the protein and normalize it using sigmoidNormalization09 with a b of 5                                                                                           | Assign to each amino acid the highest copy number it's involved in, calculate the mean of that value for the amino acids inside the peptide and normalize it using sigmoidNormalization09 with a b of 5 |
| Cross Reactivity       | For each kmer in the protein, normalize the amount of times that kmer appears in the host proteome using sigmoidNormalization05 with a b of 1, then calculate the mean of these values            | For each kmer in the peptide, normalize the amount of times that kmer appears in the host proteome using sigmoidNormalization05 with a b of 1, then, calculate the mean of these values                 |
| Self Similarity        | For each kmer in the protein, normalize the amount of other times that kmer appears in the proteome using sigmoidNormalization05 with a b of 1, then calculate the mean of these values           | For each kmer in the peptide, normalize the amount of other times that kmer appears in the proteome using sigmoidNormalization05 with a b of 1, then, calculate the mean of these values                |

**Table S4. Comparison between APRANK and a version of APRANK without the the predictor with highest solo AUC (BepiPred 1.0).** The relative AUC gain shows the increase or decrease of the AUC obtained by APRANK relative to the version of APRANK without BepiPred. In bold we show differences greater than 5%. Due to the large number of peptides, each individual peptide AUC was calculated as the mean of 5 pseudo-random subsets of 50,000 peptides (see Methods).

| Species         | Group     | Proteins APRANK score |                   |                   | Peptides APRANK score |                   |                   |
|-----------------|-----------|-----------------------|-------------------|-------------------|-----------------------|-------------------|-------------------|
|                 |           | without BepiPred AUC  | with BepiPred AUC | Relative AUC gain | without BepiPred AUC  | with BepiPred AUC | Relative AUC gain |
| B. burgdorferi  | Gram -    | 0.777                 | 0.786             | 1.18%             | 0.726                 | <b>0.768</b>      | <b>5.78%</b>      |
| B. melitensis   | Gram -    | 0.749                 | 0.774             | 3.39%             | -                     | -                 | -                 |
| C. burnetii     | Gram -    | 0.616                 | 0.620             | 0.61%             | -                     | -                 | -                 |
| E. coli         | Gram -    | 0.751                 | 0.754             | 0.42%             | 0.743                 | 0.742             | -0.07%            |
| F. tularensis   | Gram -    | 0.714                 | 0.698             | -2.15%            | -                     | -                 | -                 |
| L. interrogans  | Gram -    | 0.938                 | 0.947             | 0.96%             | 0.646                 | <b>0.679</b>      | <b>5.15%</b>      |
| P. gingivalis   | Gram -    | 0.847                 | 0.854             | 0.75%             | 0.626                 | <b>0.665</b>      | <b>6.19%</b>      |
| M. leprae       | Gram +    | 0.750                 | 0.758             | 1.04%             | 0.657                 | <b>0.692</b>      | <b>5.37%</b>      |
| M. tuberculosis | Gram +    | 0.697                 | 0.702             | 0.66%             | 0.586                 | 0.586             | 0.00%             |
| S. aureus       | Gram +    | 0.762                 | 0.737             | -3.31%            | 0.751                 | 0.752             | 0.19%             |
| S. pyogenes     | Gram +    | 0.983                 | 0.983             | 0.04%             | 0.826                 | 0.838             | 1.47%             |
| L. braziliensis | Eukaryote | 0.687                 | 0.709             | 3.20%             | 0.928                 | 0.946             | 1.88%             |
| P. falciparum   | Eukaryote | 0.801                 | 0.807             | 0.84%             | 0.753                 | 0.748             | -0.73%            |
| T. gondii       | Eukaryote | 0.835                 | 0.837             | 0.27%             | 0.585                 | 0.583             | -0.47%            |
| T. cruzi        | Eukaryote | 0.869                 | 0.867             | -0.29%            | 0.833                 | 0.843             | 1.26%             |

**Table S5. Comparison between APRANK and a ‘BLAST model’.** The ‘BLAST model’ worked by assigning to each protein a score related to how similar they were to a recorded antigenic protein. For the two species that resulted in a better prediction when using the ‘BLAST model’, we also tested removing from the BLAST results (and so, from the ‘model’) the species that was the most similar to the one being analyzed. In bold we show differences greater than 5%.

| Species                                      | Proteins     |               |                      |
|----------------------------------------------|--------------|---------------|----------------------|
|                                              | BLAST<br>AUC | APRANK<br>AUC | Relative<br>AUC gain |
| B. burgdorferi                               | 0.502        | 0.786         | <b>56.60%</b>        |
| B. melitensis                                | 0.637        | 0.774         | <b>21.49%</b>        |
| C. burnetii                                  | 0.579        | 0.620         | <b>7.14%</b>         |
| E. coli                                      | 0.677        | 0.754         | <b>11.44%</b>        |
| F. tularensis                                | 0.629        | 0.698         | <b>10.92%</b>        |
| L. interrogans                               | 0.499        | 0.947         | <b>89.86%</b>        |
| P. gingivalis                                | 0.544        | 0.854         | <b>57.04%</b>        |
| M. leprae                                    | 0.893        | 0.758         | <b>-15.10%</b>       |
| M. tuberculosis                              | 0.591        | 0.702         | <b>18.78%</b>        |
| S. aureus                                    | 0.622        | 0.737         | <b>18.56%</b>        |
| S. pyogenes                                  | 0.542        | 0.983         | <b>81.26%</b>        |
| L. braziliensis                              | 0.951        | 0.709         | <b>-25.42%</b>       |
| P. falciparum                                | 0.594        | 0.807         | <b>35.77%</b>        |
| T. gondii                                    | 0.443        | 0.837         | <b>88.98%</b>        |
| T. cruzi                                     | 0.501        | 0.867         | <b>72.95%</b>        |
| M. Leprae (without M. tuberculosis in BLAST) | 0.650        | -             | <b>16.63%</b>        |
| L. braziliensis (without T. cruzi in BLAST)  | 0.744        | -             | -4.74%               |

### 3 FORMULAS

$$fixedLinearNormalization(x, m, M) = \begin{cases} 0 & \text{for } x \leq m \\ \frac{x-m}{M-m} & \text{for } m < x < M \\ 1 & \text{for } x \geq M \end{cases} \quad (S1)$$

$$sigmoidNormalization05(x, b) = -1 + \frac{2}{1 + 3^{-\frac{x}{b}}} \quad (S2)$$

$$sigmoidNormalization09(x, b) = -1 + \frac{2}{1 + 20^{-\frac{x}{b}}} \quad (S3)$$
